# Supplementary material
Source: ML conference proceedings conference paper supplement (https://openreview.net/forum?id=6RlbOEcOS4)
Supplement: supplementary_material [file appendix.pdf › appendix.pdf]

## 808 Appendix

|     |                                                                                     |           |
|-----|-------------------------------------------------------------------------------------|-----------|
| 809 | <b>A Assumptions and auxiliary results</b>                                          | <b>22</b> |
| 810 | A.1 Additional notation . . . . .                                                   | 22        |
| 811 | A.2 Technical assumptions . . . . .                                                 | 22        |
| 812 | A.3 Useful identities . . . . .                                                     | 22        |
| 813 | <b>B Proofs</b>                                                                     | <b>23</b> |
| 814 | <b>C Further related works, broader impact, and limitations</b>                     | <b>23</b> |
| 815 | C.1 Further related works . . . . .                                                 | 23        |
| 816 | C.2 Limitations . . . . .                                                           | 24        |
| 817 | C.3 Broader impact . . . . .                                                        | 24        |
| 818 | <b>D Background on SOC</b>                                                          | <b>24</b> |
| 819 | D.1 Stochastic optimal control . . . . .                                            | 24        |
| 820 | D.2 Iterative diffusion optimization . . . . .                                      | 25        |
| 821 | <b>E Background on diffusion-based sampling</b>                                     | <b>25</b> |
| 822 | E.1 Experimental setup . . . . .                                                    | 26        |
| 823 | E.2 Evaluation criteria . . . . .                                                   | 27        |
| 824 | E.3 Additional experiments . . . . .                                                | 28        |
| 825 | <b>F Transition path sampling</b>                                                   | <b>29</b> |
| 826 | F.1 Experimental details . . . . .                                                  | 29        |
| 827 | F.2 Additional Experimental Result Discussion . . . . .                             | 29        |
| 828 | <b>G Classical SOC problems</b>                                                     | <b>31</b> |
| 829 | G.1 Experimental Setup . . . . .                                                    | 31        |
| 830 | G.2 Benchmark problem details . . . . .                                             | 31        |
| 831 | G.3 Results . . . . .                                                               | 32        |
| 832 | <b>H Fine-tuning of diffusion models</b>                                            | <b>32</b> |
| 833 | H.1 Fine-tuning experimental details . . . . .                                      | 32        |
| 834 | <b>I Trust region SOC sequences are equispaced in the Fisher-Rao distance</b>       | <b>33</b> |
| 835 | I.1 Basics on information geometry . . . . .                                        | 33        |
| 836 | I.1.1 A first example: the manifold of smooth densities . . . . .                   | 33        |
| 837 | I.2 A second example: exponential families . . . . .                                | 34        |
| 838 | I.3 Local expansion of the Kullback–Leibler divergence . . . . .                    | 35        |
| 839 | I.4 Information geometry on the exponential family of path measures . . . . .       | 35        |
| 840 | <b>J Details on trust region SOC algorithms</b>                                     | <b>36</b> |
| 841 | J.1 Characterizing the solutions of the trust region optimization problem . . . . . | 36        |
| 842 | J.2 Implementation . . . . .                                                        | 37        |

|     |          |                                                                                    |           |
|-----|----------|------------------------------------------------------------------------------------|-----------|
| 843 | J.3      | Variance of the importance weights and trust region bounds . . . . .               | 37        |
| 844 | J.4      | Lagrangian formulation . . . . .                                                   | 38        |
| 845 | J.5      | Log-variance with buffer and trust regions . . . . .                               | 39        |
| 846 | J.6      | Trust-region stochastic optimal control matching via adjoint method . . . . .      | 40        |
| 847 | J.7      | Trust-region stochastic optimal control matching via lean adjoint method . . . . . | 41        |
| 848 | <b>K</b> | <b>Trust regions for probability measures</b>                                      | <b>41</b> |

## A Assumptions and auxiliary results

### A.1 Additional notation

For vectors  $v_1, v_2 \in \mathbb{R}^d$ , we denote by  $\|v\|$  the Euclidean norm and by  $v_1 \cdot v_2$  the Euclidean inner product. For a real-valued matrix  $A$ , we denote by  $\text{Tr}(A)$  and  $A^\top$  its trace and transpose.

For a sufficiently smooth function  $f: \mathbb{R}^d \times [0, T] \rightarrow \mathbb{R}$ , we denote by  $\nabla f = \nabla_x f$  its gradient w.r.t. the spatial variables  $x$  and by  $\partial_t f$  and  $\partial_{x_i} f$  its partial derivatives w.r.t. the time coordinate  $t$  and the spatial coordinate  $x_i$ , respectively.

We denote by  $\mathcal{N}(\mu, \Sigma)$  a multivariate normal distribution with mean  $\mu \in \mathbb{R}^d$  and covariance matrix  $\Sigma \in \mathbb{R}^{d \times d}$ . Moreover, we denote by  $\text{Unif}([0, T])$  the uniform distribution on  $[0, T]$ . For random variables  $X_1, X_2$ , we denote by  $\mathbb{E}[X_1]$  and  $\text{Var}[X_1]$  the expectation and variance of  $X_1$  and by  $\mathbb{E}[X_1|X_2]$  the conditional expectation of  $X_1$  given  $X_2$ .

### A.2 Technical assumptions

Throughout our work, we make the same assumptions as in [101, 85], which are needed for all the objects considered to be well-defined. Namely, we assume that:

(i) The set  $\mathcal{U}$  of *admissible controls* is given by

$$\mathcal{U} = \{u \in C^1(\mathbb{R}^d \times [0, T]; \mathbb{R}^d) \mid \exists C > 0, \forall (x, s) \in \mathbb{R}^d \times [0, T], u(x, s) \leq C(1 + \|x\|)\}. \quad (20)$$

(ii) The coefficients  $b$  and  $\sigma$  are continuously differentiable,  $\sigma$  has bounded first-order spatial derivatives, and  $(\sigma\sigma^\top)(x, s)$  is positive definite for all  $(x, s) \in \mathbb{R}^d \times [0, T]$ . Furthermore, there exist constants  $C, c_1, c_2 > 0$  such that

$$\begin{aligned} \|b(x, s)\| &\leq C(1 + \|x\|), & \text{(linear growth)} \\ c_1 \|\beta\|^2 &\leq \beta^\top (\sigma\sigma^\top)(x, s) \beta \leq c_2 \|\beta\|^2, & \text{(ellipticity)} \end{aligned} \quad (21)$$

for all  $(x, s) \in \mathbb{R}^d \times [0, T]$  and  $\beta \in \mathbb{R}^d$ .

### A.3 Useful identities

**Girsanov.** For a generic  $v \in \mathcal{U}$ , consider the two SDEs

$$dX_s^v = (b(X_s^v, s) + \sigma v(X_s^v, s)) ds + \sigma dW_s, \quad X_0^v \sim p_0 \quad (22)$$

$$dX_s = b(X_s, s) ds + \sigma dW_s, \quad X_0 \sim p_0. \quad (23)$$

By Girsanov's theorem, we have that for any  $u, w \in \mathcal{U}$

$$\log \frac{d\mathbb{P}^u}{d\mathbb{P}}(X^w) = \int_0^T \sigma^{-1} u(X_s^w, s) \cdot dX_s^w - \int_0^T (\sigma^{-1} b \cdot u)(X_s^w, s) ds - \frac{1}{2} \int_0^T \|u(X_s^w, s)\|^2 ds. \quad (24)$$

It follows that

$$\log \frac{d\mathbb{P}^u}{d\mathbb{P}}(X^u) = \int_0^T u(X_s^u, s) \cdot dW_s + \frac{1}{2} \int_0^T \|u(X_s^u, s)\|^2 ds, \quad (25)$$

and

$$\log \frac{d\mathbb{P}^u}{d\mathbb{P}}(X) = \int_0^T u(X_s, s) \cdot dW_s - \frac{1}{2} \int_0^T \|u(X_s, s)\|^2 ds. \quad (26)$$

Moreover, it holds that (see [123] Appendix E)

$$\log \frac{d\mathbb{P}^u}{d\mathbb{P}^v}(X^w) = \int_0^T \sigma^{-1} (u - v)(X_s^w, s) \cdot dX_s^w - \frac{1}{2} \int_0^T (\|\sigma^{-1} b + u\|^2 - \|\sigma^{-1} b + v\|^2)(X_s^w, s) ds, \quad (27)$$

from which follows that

$$\log \frac{d\mathbb{P}^u}{d\mathbb{P}^v}(X^u) = \int_0^T (u - v)(X_s^u, s) \cdot dW_s + \frac{1}{2} \int_0^T \|u - v\|^2(X_s^u, s) ds, \quad (28)$$

and

$$\log \frac{d\mathbb{P}^u}{d\mathbb{P}^v}(X^v) = \int_0^T (u - v)(X_s^v, s) \cdot dW_s - \frac{1}{2} \int_0^T \|u - v\|^2(X_s^v, s) ds, \quad (29)$$

**Itô formula.** Consider the stochastic process  $X$  defined by the SDE

$$dX_s = b(X_s, s) ds + \sigma dW_s \quad (30)$$

with infinitesimal generator  $L := \frac{1}{2} \sum_{i,j} (\sigma\sigma^\top)_{ij} \partial_{x_i} \partial_{x_j} + \sum_i b_i(x, t) \partial_{x_i}$ . The dynamics of  $f(X_s, s)$  is given by

$$df(X_s, s) = (\partial_s + L)f(X_s, s) ds + \sigma^\top \nabla f(X_s, s) \cdot dW_s. \quad (31)$$

## B Proofs

*Proof of Prop. 2.2.* Let  $\tilde{\mathbb{P}}$  be the measure defined by  $\frac{d\tilde{\mathbb{P}}}{d\mathbb{P}^{u_i}} = \left(\frac{d\mathbb{Q}}{d\mathbb{P}^{u_i}}\right)^{\frac{1}{1+\lambda_i}} / \tilde{\mathcal{Z}}$ , where  $\tilde{\mathcal{Z}}$  is the normalizing constant. Then we have that

$$(1 + \lambda_i) \log \frac{d\mathbb{P}^u}{d\tilde{\mathbb{P}}} = (1 + \lambda_i) \log \left( \frac{d\mathbb{P}^u}{d\mathbb{P}^{u_i}} \frac{d\mathbb{P}^{u_i}}{d\tilde{\mathbb{P}}} \right) = (1 + \lambda_i) \log \frac{d\mathbb{P}^u}{d\mathbb{P}^{u_i}} + \log \frac{d\mathbb{P}^{u_i}}{d\mathbb{Q}} + (1 + \lambda_i) \log \tilde{\mathcal{Z}} \quad (32)$$

$$= \lambda_i \log \frac{d\mathbb{P}^u}{d\mathbb{P}^{u_i}} + \log \frac{d\mathbb{P}^u}{d\mathbb{Q}} + (1 + \lambda_i) \log \tilde{\mathcal{Z}}. \quad (33)$$

Using the definition of the Lagrangian in (5), this implies that

$$(1 + \lambda_i) D_{\text{KL}}(\mathbb{P}^u | \tilde{\mathbb{P}}) = \lambda_i D_{\text{KL}}(\mathbb{P}^u | \mathbb{P}^{u_i}) + D_{\text{KL}}(\mathbb{P}^u | \mathbb{Q}) + (1 + \lambda_i) \log \tilde{\mathcal{Z}} \quad (34)$$

$$= \mathcal{L}_{\text{Tr}}^{(i)}(u, \lambda_i) + (1 + \lambda_i) \log \tilde{\mathcal{Z}} + \lambda_i \varepsilon, \quad (35)$$

Since we defined the minimizer of the Lagrangian (with optimal multiplier  $\lambda_i$ ) in the last expression as  $u_{i+1}$ , we have that  $u_{i+1} = \arg \min_{u \in \mathcal{U}} D_{\text{KL}}(\mathbb{P}^u | \tilde{\mathbb{P}})$ . This shows that  $\tilde{\mathbb{P}} = \mathbb{P}^{u_{i+1}}$  by the uniqueness of the Radon-Nikodym derivative. The second statement then follows by induction.  $\square$

## C Further related works, broader impact, and limitations

### C.1 Further related works

**Monte Carlo estimator.** In theory, one could directly compute the optimal control using the representations in Prop. 2.5 (for  $\lambda = 0$  and  $i = 0$ ; see Item 1 in Thm. D.1) combined with Monte Carlo estimates<sup>6</sup> of the value function in Item 4 [94, 122, 95, 80, 116]. However, in practice this can be problematic since it requires a large amount of samples *for each state*  $x$  due to the (typically) very high variance of the estimator for  $V$  [122]. In particular, we note that the variance translates to bias in the control due to the logarithmic transform. Moreover, for nonzero  $f$  or general  $b$  (e.g., in the fine-tuning setting), one needs to *simulate* the uncontrolled process to obtain samples.

**PDE solver.** One can also leverage the representation of the value function as the solution of a HJB equation (see Item 3 in Thm. D.1). While solving PDEs in high dimensions is very challenging, there exist scalable approaches based on tensor trains and neural networks<sup>7</sup> that leverage backward stochastic differential equations or the Hopf-Cole transform in combination with the Feynman-Kac formula [90, 67, 104, 66, 105, 108, 107, 64]. However, in practice, we only need the value function in the domain where the optimal path measure has sufficiently large values, which is typically not considered for PDE solvers.

**Iterative diffusion optimization.** To focus more on promising regions of the path space, methods for iterative diffusion optimization simulate (sub-)trajectories of the controlled SDE to compute a suitable loss and update the control. Typically, the control is parametrized as a neural network and optimized using variants of stochastic gradient descent. While such methods have been explored for general SOC problems with quadratic control costs [101, 104, 84, 81], many recent works have focus on the special case of sampling from unnormalized densities as described in Sec. 3.1; see, e.g., [129, 68, 122, 127, 123, 111, 100, 65]. From the perspective of path measures, all these works propose to minimize suitable divergences between measures induced by controlled SDEs. While we demonstrate the benefits of leveraging trust region methods for the *Denoising Diffusion Sampler* (DDS) [121], our method could also be extended to other samplers.

**Transition path sampling.** Transition path sampling has been a longstanding problem in physics and chemistry to understand phase transition and chemical reaction, with applications in energy, catalysis, and drug discovery [71, 120]. Computationally, MCMC-based approaches have been extended to path space to mix the transition path distribution, pioneered by [79]. As discussed in Sec. 3.2, transition path sampling can be formulated as a stochastic optimal control problem and has been numerically solved using reverse KL divergence [126], cross-entropy divergence [93], and

<sup>6</sup>One can obtain derivative estimates using adjoint states (as defined in Sec. 2.2) or using reparametrization tricks if the uncontrolled process has suitable, known marginals. For Gaussian marginals, one can also use Stein’s lemma [94]. We also note that control variates for such estimators have been analyzed in [110, 105].

<sup>7</sup>Note that some of these approaches correspond to regressions of the Monte Carlo estimators mentioned above [122] or to the IDO methods mentioned below [115].

log-variance divergence [112], the optimal control is known to be the Doob’s h-function [73, 114, 86] (for a review, we refer to [113]). To solve the Doob’s h-function, [114] proposes a shooting-based method which requires MD simulation to reach the target state, while [86] proposes a Gaussian approximation conditioned on both the initial and target state which satisfies boundary conditions by design and provides a simulation-free optimization algorithm. Similarly to SOC, transition path sampling can also naturally be formulated as a reinforcement learning problem, as in [78, 109].

**Diffusion and flow matching reward fine-tuning.** Several of the early works on diffusion fine-tuning focused on directly optimizing the reward model making use of its differentiability [125, 74], without any KL regularization, which can lead to reward hacking. Some other works [69, 87] framed reward fine-tuning as an RL problem, but did not make the probabilistic connection to tilted distributions. [118] provides a probabilistic view of the problem, but proposes an algorithm that is hard to scale. [82] give a comprehensive view of flow matching reward fine-tuning, introducing memoryless noise schedules as the right ones, as well as a new scalable SOC algorithm that we use and adapt: adjoint matching. Using the memoryless noise schedule, a recent work [97] considers GRPO for flow matching fine-tuning. [128, 98] consider alternative algorithms which learn the value functions.

## C.2 Limitations

While our method for solving stochastic optimal control problems exhibits strong sample efficiency, it relies on storing entire trajectories in the replay buffer during training. In large-scale settings—such as fine-tuning text-to-image models—this necessitates keeping the replay buffer in CPU memory while training occurs on the GPU. This separation introduces additional computational overhead due to data transfers between CPU and GPU; however, the buffer still significantly accelerates the fine-tuning since the main computational cost in such settings stems from the simulation of trajectories.

## C.3 Broader impact

This paper proposes new methodologies and theories that find numerical solutions for stochastic optimal control problems ranging from equilibrium sampling, transition path sampling to fine-tuning text-to-image generative models. Equilibrium sampling and transition path sampling are important in Bayesian statistics, physics and chemistry where they can be used to estimate free energy, understand phase transition and rare event which hold promises to accelerate drug and materials discovery. More efficient fine-tuning of text-to-image models democratizes the generation of specialized high-quality visual content for creative applications. However, these capabilities also introduce risks such as the potential for generating convincing misinformation and deepfakes.

# D Background on SOC

## D.1 Stochastic optimal control

In this work, we consider stochastic optimal control (SOC) problems of the form

$$\min_{u \in \mathcal{U}} \mathcal{L}_{\text{soc}}(u) = \min_{u \in \mathcal{U}} \mathbb{E} \left[ \int_0^T \left( \frac{1}{2} \|u(X_s^u, s)\|^2 + f(X_s^u, s) \right) ds + g(X_T^u) \right], \quad (36)$$

with state-cost  $f$ , terminal cost  $g$  and control function  $u \in \mathcal{U}$ , where  $\mathcal{U}$  denotes a set of admissible controls; see App. A.2 for further details. Here,  $X^u$  is a controlled SDE of the form

$$dX_s^u = b(X_s^u, s) + \sigma(s)u(X_s^u, s)ds + \sigma(s)dW_s, \quad X_0 \sim p_0, \quad (37)$$

with base drift  $b$ , base distribution  $p_0$  (typically a Gaussian or dirac delta distribution), and diffusion coefficient  $\sigma$ . We denote the path measure induced by (37) by  $\mathbb{P}^u \in \mathcal{P}$ . Moreover, we simply write  $\mathbb{P}$  for the path measure corresponding to the uncontrolled process, i.e.,

$$dX_s = b(X_s, s)ds + \sigma(s)dW_s, \quad X_0 \sim p_0. \quad (38)$$

Given a time  $t$  and state  $x$ , the cost functional  $J(u; x, t)$  is the expected cost-to-go for a control  $u$  on the time interval  $[t, T]$  and is defined as

$$J(u; x, t) = \mathbb{E} \left[ \int_t^T \left( \frac{1}{2} \|u(X_s^u, s)\|^2 + f(X_s^u, s) \right) ds + g(X_T^u) \mid X_t^u = x \right]. \quad (39)$$

The value function  $V$ , or, *optimal cost-to-go* is obtained by taking the infimum over all controls in  $\mathcal{U}$ , that is,

$$V(x, t) = \inf_{u \in \mathcal{U}} J(u; x, t). \quad (40)$$

Then we have the following well-known results on representations of the value function  $V$  and solution to the SOC problem  $u^*$ ; see, e.g., [101, 102, 77, 88, 103] for details.

963 **Theorem D.1** (Optimality for SOC Problems). *Let us define the work functional as*

$$\mathcal{W}(X, t) = \int_t^T f(X_s, s) ds + g(X_T). \quad (41)$$

964 *Then we have the following representations of the value function in  $V$  in (40) and the solution  $u^*$  to*  
 965 *the SOC problem in (36):*

- 966 1. (Connection between solution and value function) *The solution can be written as  $u^* = -\sigma^\top \nabla V$ .*  
 967 2. (Optimal change of measure) *The Radon-Nikodym derivative of the optimal path measure  $\mathbb{Q}$  w.r.t.*  
 968 *the uncontrolled path measure  $\mathbb{P}$  satisfies*

$$\frac{d\mathbb{Q}}{d\mathbb{P}}(X) = \frac{e^{-\mathcal{W}(X, 0)}}{\mathcal{Z}(X_0)} \quad \text{with} \quad \mathcal{Z}(X_0) = \mathbb{E}[e^{-\mathcal{W}(X, 0)} | X_0]. \quad (42)$$

- 969 3. (PDE for value function) *The value function  $V$  is the solution to the Hamilton-Jacobi-Bellman*  
 970 *(HJB) equation*

$$(\partial_t + L)V(x, t) - \frac{1}{2} \|(\sigma^\top \nabla V)(x, t)\|^2 + f(x, t) = 0, \quad V(x, T) = g(x), \quad (43)$$

971 *where  $L := \frac{1}{2} \sum_{i,j=1}^d (\sigma \sigma^\top)_{ij} \partial_{x_i} \partial_{x_j} + \sum_{i=1}^d b_i \partial_{x_i}$  denotes the infinitesimal generator of the*  
 972 *uncontrolled SDE in (38).*

- 973 4. (Estimator for value function) *For every  $(x, t) \in \mathbb{R}^d \times [0, T]$  the value function can be written as*  
 974  *$V(x, t) = -\log \mathbb{E}[e^{-\mathcal{W}(X, t)} | X_t = x]$ , where  $X$  is the solution of the uncontrolled SDE in (38).*

975 Combining the expressions for  $u^*$  and  $V$  in Thm. D.1, we directly obtain the path integral representa-  
 976 tion of the optimal control, i.e.,

$$u^*(x, t) = \sigma(t)^\top \nabla_x \log \mathbb{E}[e^{-\mathcal{W}(X, t)} | X_t = x], \quad (44)$$

977 In practice, computing the optimal control (44) is typically impractical, as it requires running multiple  
 978 simulations for each state  $x$  to obtain a Monte Carlo approximation of the expectation; see App. C.1.  
 979 To address this challenge, many approaches instead learn a parameterized control function, optimized  
 980 using stochastic gradient methods. These techniques are collectively referred to as iterative diffusion  
 981 optimization (IDO) methods and are further discussed in the next section.

## 982 D.2 Iterative diffusion optimization

983 An alternative view on problem (36) is obtained by considering loss functions on path measures. By  
 984 the Girsanov theorem (see App. A.3) we have

$$\frac{d\mathbb{P}}{d\mathbb{P}^u}(X^u) = \exp \left( - \int_0^T u(X_s^u, s) \cdot dW_s - \frac{1}{2} \int_0^T \|u(X_s^u, s)\|^2 ds \right). \quad (45)$$

985 Combining this with the optimal change of measure  $d\mathbb{Q}/d\mathbb{P}$  in Thm. D.1, we obtain an expression  
 986 for  $d\mathbb{Q}/d\mathbb{P}^u$  from which we can compute the relative entropy  $\mathcal{L}_{\text{RE}}$ , i.e., the reverse Kullback-Leibler  
 987 (KL) divergence

$$\mathcal{L}_{\text{RE}}(u) = D_{\text{KL}}(\mathbb{P}^u \| \mathbb{Q}) = \mathbb{E} \left[ \int_0^T \left( \frac{1}{2} \|u(X_s^u, s)\|^2 + f(X_s^u, s) \right) ds + g(X_T^u) \right] + \log \mathcal{Z}. \quad (46)$$

988 Note that minimizing the stochastic optimal control problem in (36) is equal to minimizing the KL  
 989 divergence, that is,

$$u^* = \arg \min_{u \in \mathcal{U}} \mathcal{L}_{\text{SOC}}(u) = \arg \min_{u \in \mathcal{U}} \mathcal{L}_{\text{RE}}(u), \quad (47)$$

990 in the sense that both have the same unique optimal control  $u^*$  as a minimizer. As such, we can  
 991 consider an arbitrary divergence  $D : \mathcal{P} \times \mathcal{P} \rightarrow \mathbb{R}^+$  for which holds  $D(\mathbb{P}_1 | \mathbb{P}_2) = 0$  if and only if  
 992  $\mathbb{P}_1 = \mathbb{P}_2$  to solve stochastic optimal control problems. More generally, we can consider any loss  
 993 function for which the unique minimizer is the optimal control  $u^*$ . Iterative diffusion optimization  
 994 builds on this perspective and can be seen as a common framework for solving (potentially high-  
 995 dimensional) SOC problems by leveraging parameterized control functions and stochastic gradient  
 996 methods to minimize different loss functions.

## 997 E Background on diffusion-based sampling

998 We consider the task of sampling from densities of the form

$$p_{\text{target}} = \frac{\rho_{\text{target}}}{\mathcal{Z}} \quad \text{with} \quad \mathcal{Z} := \int_{\mathbb{R}^d} \rho_{\text{target}}(x) dx, \quad (48)$$

999 where  $\rho_{\text{target}} \in C(\mathbb{R}^d, \mathbb{R}_{\geq 0})$  can be evaluated pointwise, but the normalizing constant  $Z$  is typically  
1000 intractable.

1001 Here, we approach the sampling problem by using denoising diffusion-based sampling based on  
1002 the work of [121]. To that end, we consider a controlled ergodic Ornstein-Uhlenbeck (OU) process  
1003  $X = (X_s)_{s \in [0, T]}$ , i.e.,

$$dX_s^u = (-\zeta(s)X_s^u + u(X_s^u, s)) ds + \eta\sqrt{2\zeta(s)} dB_s, \quad X_0 \sim p_0, \quad (49)$$

1004 with noise schedule  $\zeta \in C([0, T], \mathbb{R})$ ,  $p_0(x) = \mathcal{N}(0, \eta^2 I)$  and corresponding path measure  $\mathbb{P}^u$ . The  
1005 target path space measure  $\mathbb{Q}$  is induced by an uncontrolled ergodic Ornstein-Uhlenbeck (OU) process,  
1006 starting from the target  $p_{\text{target}}$  and running backward in time, that is,

$$dX_s = \zeta(s)X_s ds + \eta\sqrt{2\zeta(s)} dB_s, \quad X_T \sim p_{\text{target}}, \quad (50)$$

1007 which fulfills  $\mathbb{Q}_0 \approx p_0$  for a suitable choice of  $\zeta$ . For integration, we follow [121] and use an  
1008 exponential integrator. Lastly, it can be shown that the optimal control fulfills

$$u^*(x, s) = \eta\sqrt{2\zeta(s)} \nabla_x \log \frac{\mathbb{Q}_s}{\mathbb{P}_s}(x), \quad (51)$$

1009 which is later used to analytically compute the optimal control for Gaussian mixture model target  
1010 densities. Please note that  $\mathbb{P}_s = \mathcal{N}(0, \eta^2 I)$  for all  $s \in [0, T]$  as the uncontrolled SDE is initialized at  
1011 its equilibrium distribution.

## 1012 E.1 Experimental setup

1013 Here, we provide further details on our experimental setup.

1014 **General setting.** The codebase used in this work was developed from scratch but is loosely inspired  
1015 by [github.com/facebookresearch/SOC-matching](https://github.com/facebookresearch/SOC-matching). All experiments are conducted using the  
1016 Jax library [72] and are run on a single 40GB NVIDIA A40 GPU. Our default experimental setup,  
1017 unless specified otherwise, is as follows: We use the Adam optimizer [96] with a learning rate of  
1018  $5 \times 10^{-4}$  and gradient clipping with a value of 1. We utilized 50 discretization steps using exponential  
1019 integrators. The control function  $u$  is parameterized as a fully-connected 6-layer neural network with  
1020 256 neurons and GELU activations [92]. Time embedding is achieved via Fourier features [117]. For  
1021 all experiments, we used a time horizon of  $T = 1$ .

1022 The control is parameterized as

$$u^\theta(x, t) = f_1^\theta(x, t) + f_2^\theta(t) \frac{x}{\eta^2}, \quad (52)$$

1023 and for experiments using Langevin preconditioning (LP), it is parameterized as

$$u_{\text{LP}}^\theta(x, t) = f_1^\theta(x, t) + f_2^\theta(t) \left( \frac{x}{\eta^2} + \nabla_x \log \rho_{\text{target}}(x) \right), \quad (53)$$

1024 where  $f_1$  and  $f_2$  are neural networks parameterized by  $\theta$ .

1025 For non-trust methods, we train for  $60k$  gradient steps with a batch size of 2000, amounting to a total  
1026 of  $120M$  target evaluations. In contrast, trust region methods use a buffer of length 50k refreshed 150  
1027 times during training, resulting in a total of  $60k \times 150 = 7.5M$  target evaluations. To optimize for  
1028 the next control  $u_{i+1}$ , we perform 400 gradient steps on the replay buffer using randomly sampled  
1029 batches of size 2000. All experiments use a trust-region bound of  $\varepsilon = 0.1$ .

1030 For the *Many Well* target, we set the standard deviation of the prior distribution to 1 and to 2.5 for the  
1031 Gaussian mixture target. For the randomization of the mixing weights, we uniformly sample positive  
1032 values that are normalized and rescaled such that the ratio between the maximum mixing weight and  
1033 the minimum is 3. The diffusivity is scheduled according to  $\zeta(t) = (C_{\text{max}} - C_{\text{min}}) \cos^2\left(\frac{t\pi}{2T}\right) + C_{\text{min}}$   
1034 with  $C_{\text{min}} = 0.01$  and  $C_{\text{max}} = 10$ .

1035 **Evaluation protocol and model selection.** We follow the evaluation protocol of prior work [70] and  
1036 evaluate all performance criteria 100 times during training, using 2000 samples for each evaluation.  
1037 We apply a running average with a window of 5 evaluations to smooth out short-term fluctuations and  
1038 obtain more robust results within a single run. We conducted each experiment using four different  
1039 random seeds and averaged the best results for each run.

1040 **Benchmark problem details.** The *ManyWell* target involves a  $d$ -dimensional *double well* potential,  
1041 corresponding to the (unnormalized) density

$$\rho_{\text{target}}(x) = \exp \left( - \sum_{i=1}^m (x_i^2 - \delta)^2 - \frac{1}{2} \sum_{i=m+1}^d x_i^2 \right),$$

with  $m \in \mathbb{N}$  representing the number of combined double wells (resulting in  $2^m$  modes), and a separation parameter  $\delta \in (0, \infty)$  (see also [124]). In our experiments, we set  $m = 5$  leading to  $2^m = 32$  modes. The separation parameter is set to  $\delta = 4$ . Since  $\rho_{\text{target}}$  factorizes across dimensions, we can compute a reference solution for  $\log \mathcal{Z}$  via numerical integration, as described in [99].

Moreover, we consider a Gaussian mixture model (GMM) target of the form

$$p_{\text{target}}(x) = \sum_{k=1}^K \pi_k \mathcal{N}(x | \mu_k, \Sigma_k), \quad (54)$$

where  $\mu_k \in \mathbb{R}^d$ ,  $\Sigma_k \in \mathbb{R}^{d \times d}$ ,  $\pi_k \geq 0$ , and  $\sum_{k=1}^K \pi_k = 1$ . To compute the optimal control  $u^*$ , we exploit the fact that the optimal marginal path measures  $\mathbb{Q}_t(x)$  can be derived analytically [100]:

$$\mathbb{Q}_t(x) = \sum_{k=1}^K \pi_k \mathcal{N}\left(x | \mu_k e^{-\int_t^T \zeta(s) ds}, \Sigma_k e^{-2 \int_t^T \zeta(s) ds} + \eta^2 \int_t^T 2\zeta(s) e^{-2 \int_t^s \zeta(u) du} ds\right). \quad (55)$$

and used for computing the optimal control  $u^*$ . Finally, to compute the total variation distance, we leverage the known true mixing weights  $\pi_k$  and define the mode partitions  $S_k \subset \mathbb{R}^d$  as

$$S_k = \{x \in \mathbb{R}^d | \arg \max_j \pi_j \mathcal{N}(x | \mu_j, \Sigma_j) = k\}. \quad (56)$$

## E.2 Evaluation criteria

Here, we provide further information on how our evaluation criteria are computed.

**Control  $L^2$  error.** Assuming access to the optimal control  $u^*$ , we can compute the  $L^2$  error between the optimal and the learned control, i.e.,

$$\text{control } L^2 \text{ error} := \mathbb{E} \left[ \int_0^T \frac{1}{2} \|u^* - u\|^2 (X^{u^*}, s) ds \right] \quad (57)$$

where  $X^{u^*}$  is obtained by simulating the controlled process with  $u^*$ , and compute the error using a Monte Carlo estimate. Note that this quantity is equivalent to the forward Kullback-Leibler divergence

$$D_{\text{KL}}(\mathbb{Q} | \mathbb{P}^u) = \mathbb{E} \left[ \log \frac{d\mathbb{Q}}{d\mathbb{P}^u}(X^{u^*}) \right]. \quad (58)$$

Via Girsanov's theorem (see App. A.3) we have that

$$\frac{d\mathbb{Q}}{d\mathbb{P}^u}(X^{u^*}) = \int_0^T (u^* - u)(X^{u^*}, s) \cdot dW_s + \int_0^T \frac{1}{2} \|u^* - u\|^2 (X^{u^*}, s) ds. \quad (59)$$

The desired equivalence follows from the fact that, under mild regularity assumptions, the stochastic integral in (59) is a martingale and has vanishing expectation.

**Log-normalizing constant.** By definition, the log-normalizing constant is given by

$$\mathcal{Z}(X_0) = \mathbb{E} \left[ e^{-\mathcal{W}(X, 0)} | X_0 \right] = \mathbb{E} \left[ \frac{d\mathbb{Q}}{d\mathbb{P}}(X) \right]. \quad (60)$$

Applying a change of measure to the controlled process yields

$$\mathcal{Z}(X_0) = \mathbb{E} \left[ e^{-\mathcal{W}(X^u, 0)} \frac{d\mathbb{P}}{d\mathbb{P}^u}(X^u) | X_0 \right] = \mathbb{E} \left[ e^{-\int_0^T \frac{1}{2} \|u(X_s^u, s)\|^2 ds - \int_0^T u(X_s^u, s) \cdot dW_s - \mathcal{W}(X^u, 0)} | X_0 \right], \quad (61)$$

which can be estimated via Monte Carlo using samples from the current control  $u$ .

**Sinkhorn distance.** We estimate the Sinkhorn distance  $\mathcal{W}_\gamma^2$  [75], an entropy-regularized optimal transport distance, between model and target samples using the JAX-based ott library [76].

**Total variation distance** Inspired by recent work [70, 89], we assume access to ground truth mixing weights  $\pi_k$ ,  $k \in \{1, \dots, K\}$ , along with a partition  $\{S_1, \dots, S_K\}$  of  $\mathbb{R}^d$ , where each region  $S_k \subset \mathbb{R}^d$  corresponds to the  $k$ th mode of the target distribution. We estimate the empirical mixing weights using

$$\hat{\pi}_k = \frac{\mathbb{E} [\mathbb{1}_{S_k}(X_T^u)]}{\sum_{k'=1}^K \mathbb{E} [\mathbb{1}_{S_{k'}}(X_T^u)]}. \quad (62)$$

Using these estimates, we compute the total variation distance (TVD) between the empirical and true mode weights as

$$\text{TVD} = \sum_{k=1}^K |\pi_k - \hat{\pi}_k|. \quad (63)$$



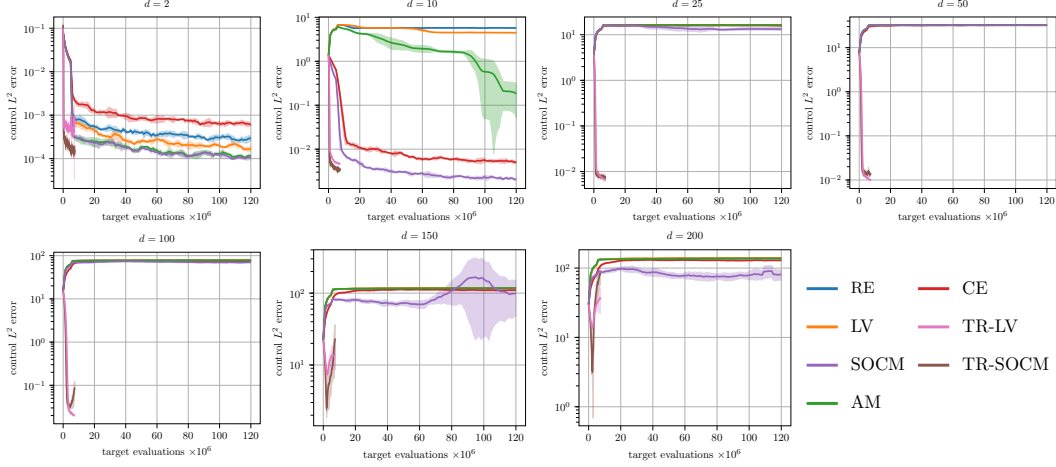

Figure 7: Control  $L^2$  error as a function of the number of target evaluations for the GMM target across varying problem dimensionalities  $d$ . All results are averaged across four random seeds.

Details on how the ground truth mixing weights and the corresponding mode regions  $S_k$  are defined can be found in the descriptions of the target densities.

### E.3 Additional experiments

Here, we provide results for additional numerical experiments.

**Gaussian Mixture 40 (GMM40).** We further evaluate the performance of trust-region-based losses by comparing them to existing SOC losses on the well-established GMM40 benchmark [99]. In this task, the target distribution is a Gaussian mixture model with 40 components, where the means are uniformly sampled from the interval  $[-40, 40]$ , and each component has an initial variance of 1. We set the prior’s standard deviation to  $\eta = 30$ . The results, presented in Fig. 8, show that only two losses, Cross-Entropy (CE) and trust-region with log-variance (TR-LV), can consistently learn all 40 modes. Notably, TR-LV achieves this with approximately ten times fewer target evaluations than CE.

**Control  $L^2$  error vs. target evaluations.** We extend the results presented in Sec. 3.1 for the GMM benchmark by providing a detailed analysis of the control  $L^2$  error as a function of the number of target evaluations across varying problem dimensionalities  $d$ . For  $d = 2$ , all SOC losses achieve low control error. However, at  $d = 10$ , some methods begin to exhibit elevated control error due to mode collapse. As the dimensionality increases further, only trust-region-based losses consistently maintain low control error. While these methods show partial mode collapse for  $d \geq 150$ , we anticipate that this issue can be mitigated by refining the control function architecture or by employing larger buffer and batch sizes. Importantly, trust-region methods also require significantly fewer target evaluations—a key advantage in many real-world applications where evaluations are costly.

**Influence of trust region bounds.** We further investigate the effect of different trust-region bound values  $\varepsilon$  on the GMM target using TR-LV. The results are presented in Fig. 10. The left figure shows that smaller trust-region bounds significantly improve performance:  $\varepsilon = 0.01$  yields up to an order of magnitude lower control error compared to  $\varepsilon = 1$ . Additionally, smaller  $\varepsilon$  values help stabilize training, as evidenced by the reduced standard deviation across random seeds. In contrast, training with  $\varepsilon = 1$  becomes unstable. However, this improved stability comes at the cost of slower convergence—smaller bounds require more training iterations to effectively anneal from the prior to the target path measure, as illustrated in the middle figure. Finally, the right figure shows that the empirically observed smoothed effective sample size (ESS) aligns well with its Taylor series approximation,  $\text{ESS} = \left( \text{Var} \left( \frac{d\mathbb{P}^{(i+1)}}{d\mathbb{P}^{(i)}} \right) + 1 \right)^{-1} \approx \frac{1}{2\varepsilon+1}$  for small values of  $\varepsilon$ ; see App. J.3 for further details.

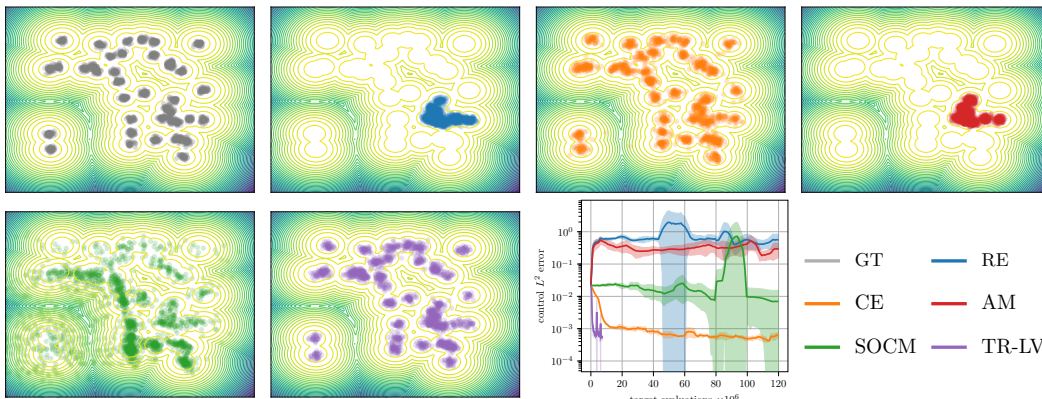

Figure 8: Qualitative and quantitative results for the GMM40 target. The qualitative plots demonstrate that only the CE (orange) and TR-LV (purple) losses successfully capture all 40 modes of the ground truth (GT, grey) distribution. This is further supported by the low  $L^2$  control error observed for these two methods. Results are averaged across four random seeds and are not reported for the log-variance loss due to numerical instabilities.

## F Transition path sampling

### F.1 Experimental details

We build upon the codebase provided by TPS-DPS [112] ([github.com/kiyoung98/tps-dps](https://github.com/kiyoung98/tps-dps)). Our experimental setups also follow [112] to ensure a fair comparison.

**MD Simulation Setup.** We run molecular dynamics simulation on the OpenMM platform. Both simulations are run at temperature 300K. For Alanine Dipeptide, we use the ‘amber99sbildn.xml’ forcefield with a VVVR integrator to simulate in vaccum. Each timestep is set as 1 femtosecond. Each path sampled is of length 1,000. For Chignolin, we use the ‘protein.ff14SBonlysc.xml’ forcefield with implicit solvent model ‘gbs2.xml’ with a VVVR integrator. Each timestep is set as 1 femtosecond. Each path sampled is of length 5,000.

**Target Hit.** For Alanine Dipeptide, target hit is defined over the two dihedral angles  $\phi$  and  $\psi$  and a distance radius within 0.75Å. For Chignolin, a long MD simulation is pre-loaded with Time-lagged independent component analysis (TICA) to select the first two dimensions that capture most variance. The region is then defined over the two dimensions with a radius of 0.75.

**Training process.** Annealing is applied from 600K to 300K. A replay buffer is used with buffer size 1,000 and 200 for Alanine Dipeptide and Chignolin, respectively. and training over buffer per iteration is 1,000 times.

**Hyperparameters:** The trust-region constraint is set to  $\varepsilon = 0.01$  for Alanine Dipeptide and  $\varepsilon = 0.2$  for Chignolin. Batch size for both systems is set to 16, Alanine Dipeptide is trained for 2000 iterations, while Chignolin is trained for 50 iterations.

**Computing Resources:** Each experiment is run on a single 80GB NVIDIA H100 GPU.

### F.2 Additional Experimental Result Discussion

We discuss our results in comparison to [112]. First of all, we evaluate three seed average as we notice the high variance nature of the transition path sampling problem—running several times can have huge variance in results (also evidenced in Fig. 4). We can also observe the trust-region constraint helps to stabilize the training significantly and thus have much smaller variance across three runs. Notably, for Alanine Dipeptide, both methods start with zero hitting percentage, while in Chignolin, in the beginning both methods already have some trajectories that hit the target, trust-region constraint is already effective in improving the efficiency. We use almost the exact same setup as in [112] with the only difference being the batch size for Chignolin is 16 instead of 4. We do not tune the model as our goal is to show the trust-region constraint improves the training stability and thus the efficiency and accuracy in terms of number of energy calls.

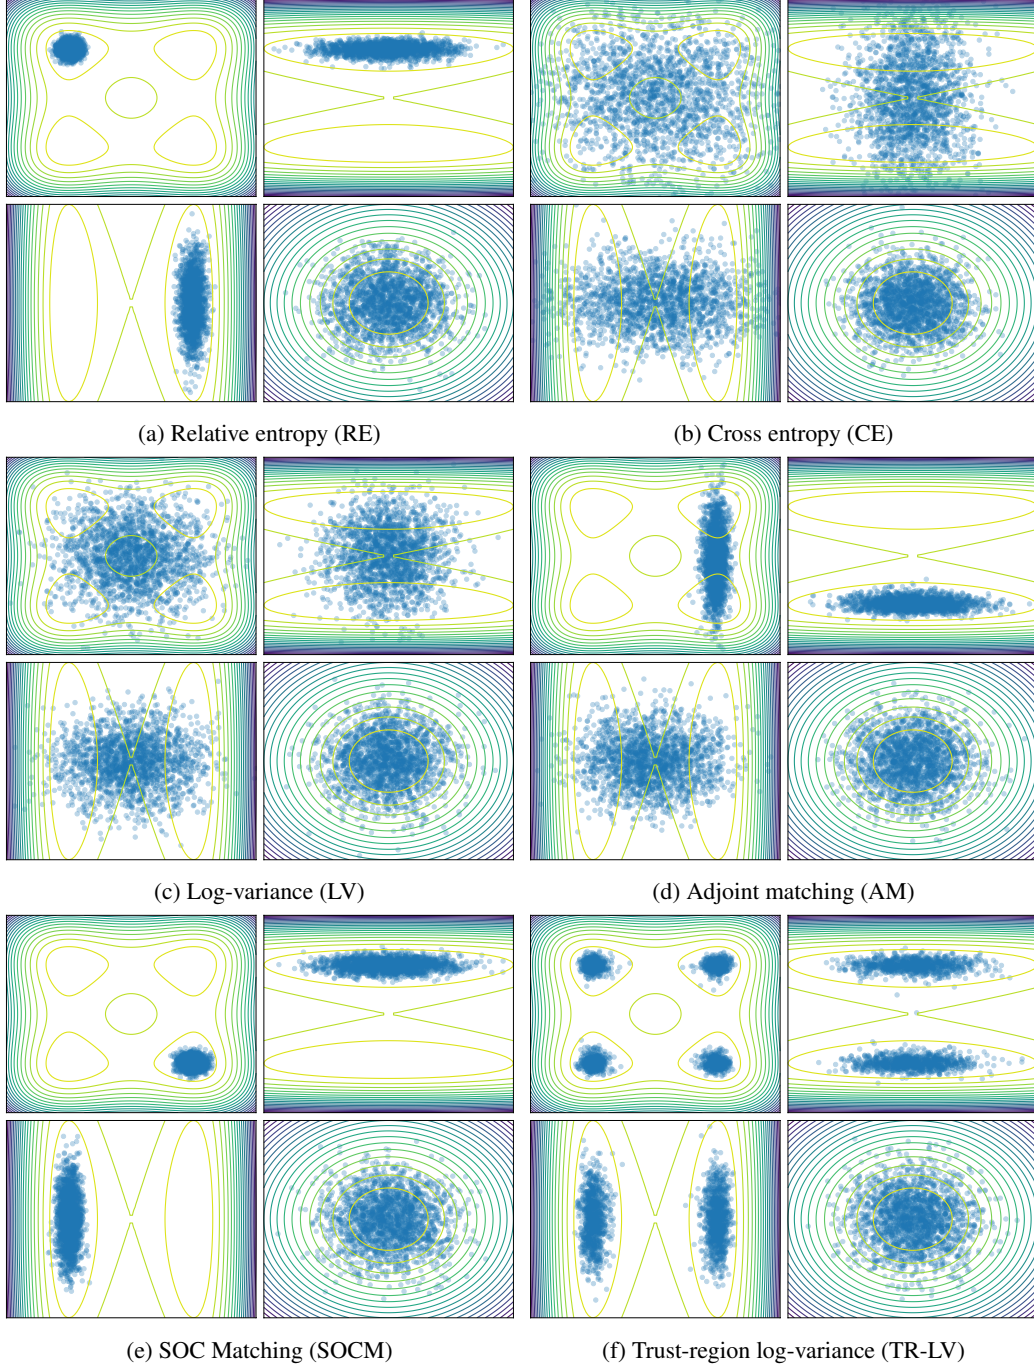

Figure 9: Qualitative results for the *Many Well* target with  $d = 200$ . Level plots depict the ground truth density for pairs of marginal distributions, while blue dots represent samples generated by models trained using the respective loss functions (indicated in the sub-captions). Among all methods, only the trust-region-based log-variance loss successfully avoids mode collapse and convergence issues. Interestingly, although the cross-entropy loss achieves the second-lowest estimation error for  $\log \mathcal{Z}$  (see Fig. 3), the qualitative results suggest that the model fails to adequately capture the target distribution—likely due to the high variance of the importance weights. All visualizations are generated using the same random seed for consistency.



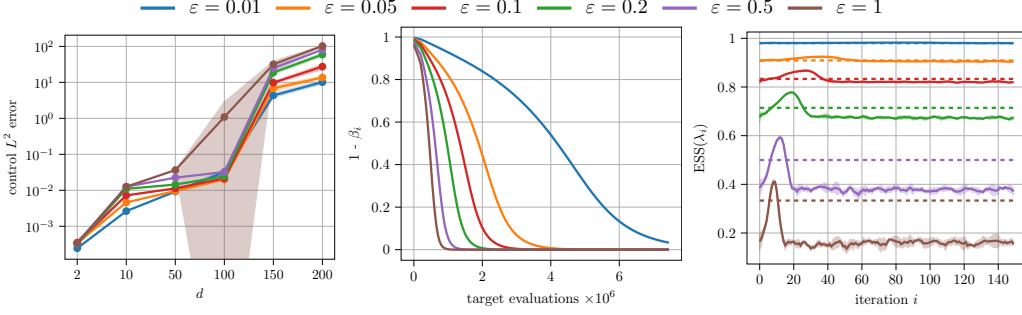

Figure 10: Influence of different trust region bound values  $\varepsilon$  on the GMM target for TR-LV. The left figure considers varying problem dimensionalities  $d$  whereas the middle and right figure report results for  $d = 100$ . The figure on the right shows the empirically observed smoothed effective sample size (ESS) and its approximation via Taylor series approximation, i.e.,  $\text{ESS} = \left( \text{Var} \left( \frac{d\mathbb{P}^{u_{i+1}}}{d\mathbb{P}^{u_i}} \right) + 1 \right)^{-1} \approx \frac{1}{2\varepsilon+1}$ , with solid and dashed lines, respectively. All results are averaged across four random seeds.

## G Classical SOC problems

Here, we consider classical SOC problems for which the optimal control can be computed analytically. These problems have been widely used in recent studies to compare different loss functions [101, 84, 81]. Here, we leverage them to showcase that importance sampling works in high dimensions when using trust-region based losses. To that end, we consider the comparison between the SOCM loss and its trust-region based counterpart.

### G.1 Experimental Setup

The experimental setup follows the setup used for diffusion-based sampling, as explained in App. E.1, including control function architecture, hyperparameter evaluation protocol, and model selection.

For discretizing the SDE, we leverage the Euler-Maruyama scheme, i.e.,

$$\hat{X}_{n+1} = \hat{X}_n + (b + \sigma u)(\hat{X}_n, n\Delta t)\Delta t + \sigma(n)\sqrt{\Delta t}\xi_n, \quad \xi_n \sim \mathcal{N}(0, I). \quad (64)$$

Since the considered benchmark problems admit analytical solutions for the optimal control  $u^*$ , we consider the  $L^2$  error between the learned and the optimal control for evaluating the models as explained in App. E.1.

### G.2 Benchmark problem details

We consider two problems taken from [101], the *Quadratic Ornstein-Uhlenbeck (OU) easy* and *Quadratic Ornstein-Uhlenbeck (OU) hard*. For convenience, we briefly introduce them again here.

**Quadratic Ornstein-Uhlenbeck (OU)** The choices for the functions of the control problem are:

$$b(x, t) = Ax, \quad f(x, t) = x^\top Px, \quad g(x) = x^\top Qx, \quad \sigma(t) = \sigma_0. \quad (65)$$

where  $Q$  is a positive definite matrix. Control problems of this form are better known as linear quadratic regulator (LQR) and they admit a closed form solution [119]. The optimal control is given by:

$$u^*(x, t) = -2\sigma_0^\top F(t)x, \quad (66)$$

where  $F(t)$  is the solution of the Ricatti equation

$$\frac{dF(t)}{dt} + A^\top F(t) + F(t)A - 2F(t)\sigma_0\sigma_0^\top F(t) + P = 0 \quad (67)$$

with the final condition  $F(T) = Q$ . Within the Quadratic OU class, we consider two settings:

- Easy: We set  $A = 0.2I$ ,  $P = 0.2I$ ,  $Q = 0.1I$ ,  $\sigma_0 = I$ ,  $\lambda = 1$ ,  $T = 1$ ,  $x_{\text{init}} \sim 0.5\mathcal{N}(0, I)$ .
- Hard: We set  $A = I$ ,  $P = I$ ,  $Q = 0.5I$ ,  $\sigma_0 = I$ ,  $\lambda = 1$ ,  $T = 1$ ,  $x_{\text{init}} \sim 0.5\mathcal{N}(0, I)$ .

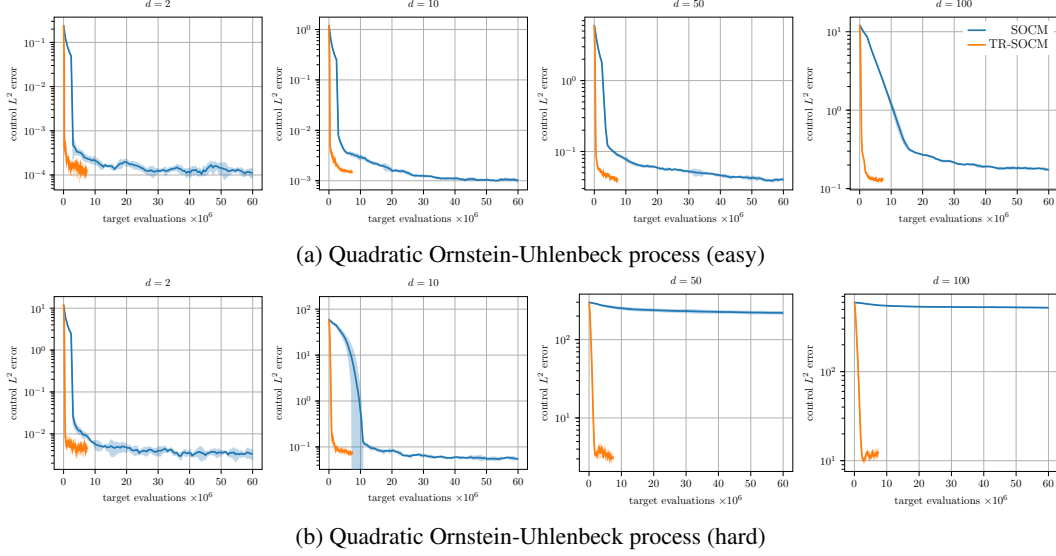

Figure 11: Control  $L^2$  error as a function of the number of target evaluations for the quadratic OU problem across varying problem dimensionalities  $d$ . All results are averaged across four random seeds.

### G.3 Results

We compare the performance of SOCM and its trust-region-based variant (TR-SOCM) on the quadratic Ornstein–Uhlenbeck (OU) problem across varying problem dimensionalities  $d$ . Both approaches rely on importance sampling, which is known to be challenging in high-dimensional settings. This experiment highlights the role of trust regions in scaling to such regimes. Results are presented in Fig. 11.

In low-dimensional settings ( $d \leq 10$ ), both methods perform comparably, although TR-SOCM exhibits significantly better sample efficiency. As the dimensionality increases ( $d \geq 50$ ), the performance of SOCM deteriorates markedly, while TR-SOCM continues to achieve low control error. For the more challenging variant of the quadratic OU problem, SOCM fails to meaningfully improve upon its initialization, whereas TR-SOCM demonstrates consistent error reduction.

These results suggest that trust regions are particularly beneficial in high-dimensional and difficult problem settings, where they provide stability and improved performance.

## H Fine-tuning of diffusion models

We take the adjoint matching (AM) implementation in `github.com/microsoft/soc-fine-tuning-sd` as our baseline, and we modify it to implement TR-SOCM.

### H.1 Fine-tuning experimental details

We generate images using classifier free guidance, with guidance scale 7.5. We use 50 inference timesteps to sample the rollouts during fine-tuning, and the evaluation samples are also generated at 50 inference timesteps.

We fine-tune using the default hyperparameters in the repo: we use AdamW, using learning rate  $3 \times 10^{-6}$ , beta 1 set to 0.9, beta 2 set to 0.95, and weight decay 0. We use an effective batch size of 500 trajectories, and 4 model backpropagations per trajectory. For the TR-SOCM loss, we use a buffer size of size 100, and 10 passes per buffer.

We use the 10000 fine-tuning prompts taken from the repository for [125], and the 100 validation prompts from the same repository (see <https://github.com/THUDM/ImageReward>). The two prompts used in Figure 6 are "masterpiece, best quality, realistic photograph, 8k, high detailed vintage motorcycle parked on a wet cobblestone street at dusk, neon reflections, shallow depth of field" and "masterpiece, best quality, ultra detailed, 8k renaissance cathedral interior, light streaming through stained-glass windows onto marble floors".

## I Trust region SOC sequences are equispaced in the Fisher-Rao distance

For a fixed  $\varepsilon$ , suppose that we construct the sequence of controls  $(u_{i+1})_{i \geq 0}$  as the solutions of the problem (4). As shown in Prop. 2.2, we have that

$$\frac{d\mathbb{P}^{u_i}}{d\mathbb{P}} \propto \left( \frac{d\mathbb{Q}}{d\mathbb{P}} \right)^{\beta_i} \left( \frac{d\mathbb{P}^{u_0}}{d\mathbb{P}} \right)^{1-\beta_i}, \quad \text{with} \quad \beta_i = 1 - \prod_{j=0}^{i-1} \frac{\lambda_j}{1+\lambda_j} \quad (68)$$

If we define the family  $(\mathbb{Q}^{(\tau)})_{\tau \in [0,1]}$  such that

$$\frac{d\mathbb{Q}^{(\tau)}}{d\mathbb{P}} \propto \left( \frac{d\mathbb{Q}}{d\mathbb{P}} \right)^{\tau} \left( \frac{d\mathbb{P}^{u_0}}{d\mathbb{P}} \right)^{1-\tau}, \quad (69)$$

we can write  $\mathbb{P}^{u_i} = \mathbb{Q}^{(\beta_i)}$ . Hence, we can regard the sequence  $(\mathbb{P}^{u_i})_{i \geq 0}$  as a discretization of the family  $(\mathbb{Q}^{(\tau)})_{\tau \in [0,1]}$ . Next, we characterize this discretization more precisely using tools from information geometry.

### I.1 Basics on information geometry

Let  $\{p(x; \theta)\}_{\theta \in \Theta}$  be a parametric family of probability densities (or mass functions) on the sample space  $\mathcal{X}$ , and let  $X$  be a random variable with distribution  $p(x; \theta)$ .

**Definition I.1** (Fisher Information Matrix). The *Fisher information matrix* at  $\theta$  is defined as

$$\mathcal{I}(\theta) = \mathbb{E}_{X \sim p(\cdot; \theta)} \left[ \nabla_{\theta} \log p(X; \theta) (\nabla_{\theta} \log p(X; \theta))^{\top} \right] = -\mathbb{E}_{X \sim p(\cdot; \theta)} \left[ \nabla_{\theta}^2 \log p(X; \theta) \right],$$

where  $\nabla_{\theta}$  denotes the column gradient with respect to  $\theta$ , and  $\nabla_{\theta}^2$  the Hessian.

As an average of positive semi-definite matrices,  $\mathcal{I}(\theta)$  is positive semi-definite, which makes it possible to define a geometric structure:

**Definition I.2** (Statistical Manifold). Let  $\{p(x; \theta)\}_{\theta \in \Theta}$  be a smooth parametric family of probability densities on  $\mathcal{X}$ , with parameter space  $\Theta \subseteq \mathbb{R}^d$ . Then  $\Theta$  itself can be viewed as a  $d$ -dimensional differentiable manifold

$$\mathcal{M} = \{p(\cdot; \theta) : \theta \in \Theta\} \cong \Theta,$$

called the *statistical manifold* of the model. Endow  $\mathcal{M}$  with the Riemannian metric

$$g_{ij}(\theta) = \mathcal{I}_{ij}(\theta) = \mathbb{E}_{X \sim p(\cdot; \theta)} \left[ \partial_i \log p(X; \theta) \partial_j \log p(X; \theta) \right],$$

where  $\partial_i = \frac{\partial}{\partial \theta_i}$ . This  $g$  is known as the *Fisher-Rao metric*, turning  $(\mathcal{M}, g)$  into the canonical information-geometric manifold of the model.

Next, we review the definition of the length of a curve on a Riemannian manifold.

**Definition I.3** (Length of a Curve on a Riemannian Manifold). Let  $(\mathcal{M}, g)$  be a  $d$ -dimensional Riemannian manifold, and let  $\gamma: [a, b] \rightarrow \mathcal{M}$  be a piecewise smooth curve. Choose local coordinates  $\theta = (\theta^1, \dots, \theta^d)$  on an open set  $\mathcal{U} \subset \mathcal{M}$  containing the image of  $\gamma$ , so that  $\gamma(t) \mapsto \theta(t) = (\theta^1(t), \dots, \theta^d(t))$ . Then the *length* of  $\gamma$  is

$$L(\gamma) = \int_a^b \sqrt{g_{ij}(\theta(t)) \dot{\theta}^i(t) \dot{\theta}^j(t)} dt,$$

where  $\dot{\theta}^i(t) = \frac{d\theta^i}{dt}(t)$  and we employ the Einstein summation convention on repeated indices  $i, j = 1, \dots, d$ .

A geodesic between two points  $\theta_1, \theta_2 \in \mathcal{M}$  is a piecewise smooth curve  $\gamma: [a, b] \rightarrow \mathcal{M}$  such that  $\gamma(a) = \theta_1, \gamma(b) = \theta_2$  that minimizes the length functional  $L$  locally. Any time reparameterization of a geodesic is also a geodesic, because The geodesic distance between  $\theta_1, \theta_2$  is the infimum over the lengths of all geodesics (or all piecewise smooth curves) between  $\theta_1, \theta_2$ .

**Definition I.4** (Fisher-Rao distance). The geodesic distance induced by the Fisher-Rao metric is known as the *Fisher-Rao distance*.

#### I.1.1 A FIRST EXAMPLE: THE MANIFOLD OF SMOOTH DENSITIES

A first instantiation of this framework is on the manifold of smooth densities, defined below.

**Definition I.5** (The Manifold of Smooth Densities). Let  $\mathcal{X}$  be a measurable space and denote by  $\mathcal{P} = \{p: \mathcal{X} \rightarrow \mathbb{R}_{>0} \mid \int_{\mathcal{X}} p(x) dx = 1\}$  the set of smooth, strictly positive probability

densities on  $\mathcal{X}$ . Then,  $\mathcal{P}$  is an infinite-dimensional (Fréchet) manifold whose tangent space at  $p$  is  $T_p\mathcal{P} = \{h: \mathcal{X} \rightarrow \mathbb{R} \mid \int_{\mathcal{X}} h(x) dx = 0\}$ .

**Definition I.6** (The Fisher–Rao Metric and Distance on  $\mathcal{P}$ ). The *Fisher–Rao metric*  $G$  on  $\mathcal{P}$  is the Riemannian metric defined at each  $p \in \mathcal{P}$  by

$$G_p(h_1, h_2) = \int_{\mathcal{X}} \frac{h_1(x) h_2(x)}{p(x)} dx, \quad h_1, h_2 \in T_p\mathcal{P}.$$

Equivalently, for a smooth path  $p_t \in \mathcal{P}$ ,

$$\|\dot{p}_t\|_{p_t} = \sqrt{G_{p_t}(\dot{p}_t, \dot{p}_t)} = \sqrt{\int_{\mathcal{X}} \frac{(\partial_t p_t(x))^2}{p_t(x)} dx}.$$

The *Fisher–Rao distance* between two densities  $p, q \in \mathcal{P}$  is the infimum of the  $G$ -lengths of all smooth paths connecting them:

$$D_{\text{FR}}(p, q) = \inf_{\substack{p_t \in \mathcal{P} \\ p_0=p, p_1=q}} \int_0^1 \sqrt{\int_{\mathcal{X}} \frac{(\partial_t p_t(x))^2}{p_t(x)} dx} dt.$$

**Proposition I.7** (Closed-form of the Fisher–Rao distance and geodesics on  $\mathcal{P}$ ). Under the embedding  $\varphi: \mathcal{P} \rightarrow L^2(\mathcal{X})$ ,  $\varphi(p) = \sqrt{p}$ ,  $\mathcal{P}$  is isometric (up to a factor of 2) to the positive orthant of the unit sphere in  $L^2$ . Hence one obtains the closed-form

$$D_{\text{FR}}(p, q) = 2 \arccos\left(\int_{\mathcal{X}} \sqrt{p(x)q(x)} dx\right).$$

Let  $\alpha = \arccos(\int_{\mathcal{X}} \sqrt{p(x)q(x)} dx)$ . The same argument shows that the Fisher–Rao geodesic  $p_t$  for  $t \in [0, 1]$  is given via the square-root map  $\varphi(p) = \sqrt{p}$  by

$$\varphi(p_t) = \frac{\sin((1-t)\alpha)}{\sin \alpha} \varphi(p) + \frac{\sin(t\alpha)}{\sin \alpha} \varphi(q),$$

so that in the original density space

$$p_t(x) = \left( \frac{\sin((1-t)\alpha)}{\sin \alpha} \sqrt{p(x)} + \frac{\sin(t\alpha)}{\sin \alpha} \sqrt{q(x)} \right)^2.$$

In particular,  $p_0 = p$ ,  $p_1 = q$ , and this path realizes the infimum in  $D_{\text{FR}}(p, q) = \int_0^1 \|\dot{p}_t\|_{p_t} dt$ .

## I.2 A second example: exponential families

**Definition I.8** (The Exponential-Family Manifold). Let

$$p(x; \theta) = \exp(\theta^i T_i(x) - A(\theta)) h(x), \quad \theta = (\theta^1, \dots, \theta^d) \in \Theta \subseteq \mathbb{R}^d$$

be a regular  $d$ -parameter exponential family on  $\mathcal{X}$ . The parameter space  $\Theta$  (equipped with the atlas coming from the coordinates  $\theta^i$ ) is a  $d$ -dimensional differentiable manifold, which we identify with the statistical model

$$\mathcal{M} = \{p(\cdot; \theta) \mid \theta \in \Theta\}.$$

Its tangent space at  $\theta$  is  $T_\theta\mathcal{M} \cong \mathbb{R}^d$ , with basis  $\{\partial/\partial\theta^i\}$ .

**Definition I.9** (Fisher–Rao Metric). The Fisher–Rao metric on  $\mathcal{M}$  is the Riemannian metric whose components in the natural coordinate chart  $\theta$  are

$$g_{ij}(\theta) = \mathbb{E}_{X \sim p(\cdot; \theta)} [\partial_i \log p(X; \theta) \partial_j \log p(X; \theta)] = -\mathbb{E}_{X \sim p(\cdot; \theta)} [\partial_{ij} \log p(X; \theta)] = \frac{\partial^2 A(\theta)}{\partial \theta^i \partial \theta^j}.$$

Equivalently,  $g(\theta) = \nabla^2 A(\theta)$ , the Hessian of the log-partition function.

For general exponential families, the Fisher–Rao distance and the geodesics do not admit a closed form. Yet, one-dimensional families can be handled explicitly, because geodesics are trivial:

**Proposition I.10** (One-Parameter Exponential Family). If  $d = 1$  then  $\theta \in (a, b) \subseteq \mathbb{R}$ , and  $g(\theta) = A''(\theta)$ . Hence

$$\text{FR}(\theta_1, \theta_2) = \left| \int_{\theta_1}^{\theta_2} \sqrt{A''(\theta)} d\theta \right|.$$

In particular, for a Poisson family  $A(\theta) = e^\theta$  one gets  $D_{\text{FR}}(\theta_1, \theta_2) = |e^{\theta_2/2} - e^{\theta_1/2}|$ .

### 1253 I.3 Local expansion of the Kullback–Leibler divergence

1254 **Proposition I.11** (Second-Order Expansion of KL). *Let  $\{p(x; \theta)\}_{\theta \in \Theta}$  be a smooth parametric family*  
 1255 *of densities, and fix  $\theta \in \Theta$ . For a small increment  $\delta \in \mathbb{R}^d$ , consider*

$$\text{KL}(p(\cdot; \theta + \delta) \| p(\cdot; \theta)) = \int_{\mathcal{X}} p(x; \theta + \delta) \log \frac{p(x; \theta + \delta)}{p(x; \theta)} dx.$$

1256 *Then one has the Taylor expansion*

$$\text{KL}(p(\theta + \delta) \| p(\theta)) = \underbrace{0}_{\text{constant term}} + \underbrace{0}_{\text{linear term}} + \frac{1}{2} \delta^i I_{ij}(\theta) \delta^j + O(\|\delta\|^3),$$

1257 *where*

$$I_{ij}(\theta) = \mathbb{E}_{X \sim p(\cdot; \theta)} [\partial_i \log p(X; \theta) \partial_j \log p(X; \theta)]$$

1258 *is the Fisher information matrix. Equivalently,*

$$\left. \frac{\partial \text{KL}}{\partial \delta^i} \right|_{\delta=0} = 0, \quad \left. \frac{\partial^2 \text{KL}}{\partial \delta^i \partial \delta^j} \right|_{\delta=0} = I_{ij}(\theta).$$

1259 *Sketch.* Expand both  $p(x; \theta + \delta)$  and  $\log p(x; \theta + \delta)$  to second order in  $\delta$ , substitute into the integral,  
 1260 and use  $\int p \partial_i \log p dx = 0$  and  $\int p \partial_i \partial_j \log p dx = -I_{ij}(\theta)$  to verify cancellation of constant and  
 1261 linear terms, leaving the stated quadratic form.  $\square$

### 1262 I.4 Information geometry on the exponential family of path measures

1263 We can view the family  $(\mathbb{Q}^{(\tau)})_{\tau \in [0,1]}$  defined in (69) as a one-parameter exponential family by  
 1264 rewriting  $\mathbb{Q}^{(\tau)}$  as

$$\frac{d\mathbb{Q}^{(\tau)}}{d\mathbb{P}^{u_0}} = \exp \left( \tau \left( \log \frac{d\mathbb{Q}}{d\mathbb{P}^{u_0}} \right) - A(\tau) \right), \quad (70)$$

1265 where the log-partition function  $A(\tau)$  is defined as

$$A(\tau) = \log \mathbb{E}_{\mathbb{P}^{u_0}} \left[ \left( \frac{d\mathbb{Q}}{d\mathbb{P}^{u_0}} \right)^\tau \right]. \quad (71)$$

1266 Equivalently, we can write it as an exponential family centered on an arbitrary  $\tau \in [0, 1]$ :

$$\frac{d\mathbb{Q}^{(\tau + \Delta\tau)}}{d\mathbb{Q}^{(\tau)}} = \exp \left( \Delta\tau \left( \log \frac{d\mathbb{Q}}{d\mathbb{P}^{u_0}} \right) - A_\tau(\Delta\tau) \right), \quad (72)$$

1267 where

$$A_\tau(\Delta\tau) := \log \mathbb{E}_{\mathbb{Q}^{(\tau)}} \left[ \left( \frac{d\mathbb{Q}}{d\mathbb{P}^{u_0}} \right)^{\Delta\tau} \right]. \quad (73)$$

1268 **Deriving an expression for the Fisher information.** Observe that by construction

$$\begin{aligned} A_\tau(\Delta\tau) &:= \log \mathbb{E}_{\mathbb{P}^{u_0}} \left[ \left( \frac{d\mathbb{Q}}{d\mathbb{P}^{u_0}} \right)^{\Delta\tau} \frac{d\mathbb{Q}^{(\tau)}}{d\mathbb{P}^{u_0}} \right] = \log \mathbb{E}_{\mathbb{P}^{u_0}} \left[ \left( \frac{d\mathbb{Q}}{d\mathbb{P}^{u_0}} \right)^{\Delta\tau} \left( \frac{d\mathbb{Q}}{d\mathbb{P}^{u_0}} \right)^\tau \exp(-A(\tau)) \right] \\ &= A(\tau + \Delta\tau) - A(\tau), \end{aligned} \quad (74)$$

1269 which means that  $A'_\tau(0) = A'(\tau)$  for all  $\tau \in (0, 1)$ . Thus, by Prop. I.10, we conclude that the Fisher  
 1270 information matrix, which is a scalar because the manifold is one-dimensional, reads

$$\mathcal{I}(\tau) = A''(\tau) = A''_\tau(0). \quad (75)$$

1271 Computing the first and second derivatives of  $A_\tau$  is straightforward:

$$A'_\tau(\Delta\tau) = \frac{\mathbb{E}_{\mathbb{Q}^{(\tau)}} \left[ \log \left( \frac{d\mathbb{Q}}{d\mathbb{P}^{u_0}} \right) \left( \frac{d\mathbb{Q}}{d\mathbb{P}^{u_0}} \right)^{\Delta\tau} \right]}{\mathbb{E}_{\mathbb{Q}^{(\tau)}} \left[ \left( \frac{d\mathbb{Q}}{d\mathbb{P}^{u_0}} \right)^{\Delta\tau} \right]}, \quad (76)$$

$$A''_\tau(0) = \mathbb{E}_{\mathbb{Q}^{(\tau)}} \left[ \log \left( \frac{d\mathbb{Q}}{d\mathbb{P}^{u_0}} \right)^2 \right] - \mathbb{E}_{\mathbb{Q}^{(\tau)}} \left[ \log \left( \frac{d\mathbb{Q}}{d\mathbb{P}^{u_0}} \right) \right]^2,$$

1272 and this implies that

$$\mathcal{I}(\tau) = \text{Var}_{\mathbb{Q}^{(\tau)}} \left[ \log \left( \frac{d\mathbb{Q}}{d\mathbb{P}^{u_0}} \right) \right]. \quad (77)$$



1273 **Connecting the trust region constraint to the Fisher information.** Applying Proposition I.11, we  
 1274 obtain that

$$\text{KL}(\mathbb{Q}^{(\tau+\Delta\tau)}|\mathbb{Q}^{(\tau)}) = \frac{\Delta\tau^2}{2}\mathcal{I}(\tau) + O(\Delta\tau^3), \quad (78)$$

1275 When we set  $\tau + \Delta\tau = \beta_{i+1}$ ,  $\tau = \beta_i$ , we have that

$$\varepsilon = \text{KL}(\mathbb{P}^{u_{i+1}}|\mathbb{P}^{u_i}) = \frac{\Delta\tau^2}{2}\mathcal{I}(\tau) + O(\Delta\tau^3). \quad (79)$$

1276 Thus,

$$\Delta\tau = \sqrt{\frac{2\varepsilon}{\mathcal{I}(\tau)}} + O(\Delta\tau^{3/2}), \quad (80)$$

1277 Moreover, the Fisher-Rao distance between  $\mathbb{P}^{u_0}$  and  $\mathbb{P}^{(i)}$ , or rather, between 0 and  $\beta_i$ ,

$$\text{FR}(0, \beta_i) = \int_0^{\beta_i} \sqrt{\mathcal{I}(\tau)} d\tau. \quad (81)$$

1278 Then, the difference between Fisher-Rao distances  $\text{FR}(0, \beta_{i+1})$  and  $\text{FR}(0, \beta_i)$  which is equal to the  
 1279 Fisher-Rao distance  $\text{FR}(\beta_i, \beta_{i+1})$  is

$$\begin{aligned} \text{FR}(0, \beta_{i+1}) - \text{FR}(0, \beta_i) &= \text{FR}(\beta_i, \beta_{i+1}) = \int_{\beta_i}^{\beta_{i+1}} \sqrt{\mathcal{I}(\tau)} d\tau \\ &= (\sqrt{\mathcal{I}(\beta_i)} + O(\beta_{i+1} - \beta_i))(\beta_{i+1} - \beta_i) = \sqrt{\mathcal{I}(\beta_i)}\Delta\tau + O(\Delta\tau^2) \\ &= \sqrt{\mathcal{I}(\beta_i)}\sqrt{\frac{2\varepsilon}{\mathcal{I}(\beta_i)}} + O(\Delta\tau^{3/2}) = \sqrt{2\varepsilon} + O(\Delta\tau^{3/2}). \end{aligned} \quad (82)$$

1280 In continuous time, we have a curve  $\beta : \mathbb{R}^{>0} \rightarrow [0, 1]$ , and

$$\frac{d}{dt}\text{FR}(0, \beta(t)) = \sqrt{\mathcal{I}(\beta(t))}\beta'(t) = \sqrt{\mathcal{I}(\beta(t))}\sqrt{\frac{2}{\mathcal{I}(\beta(t))}} = \sqrt{2} \quad (83)$$

1281 Thus, we have shown the following result:

1282 **Proposition I.12.** *Up to high order terms, the elements of sequence  $(\mathbb{P}^{u_i})_{0 \leq i \leq I-1}$  are equispaced in*  
 1283 *the Fisher-Rao distance. The last term  $\mathbb{P}^{u_I}$  is equal to the target distribution  $\mathbb{Q}$ .*

1284 **A Monte Carlo estimate for the Fisher information.** By equation (70), we have that  $\log \frac{d\mathbb{Q}^{(\tau)}}{d\mathbb{P}^{u_0}} =$   
 1285  $\tau \left( \log \frac{d\mathbb{Q}}{d\mathbb{P}^{u_0}} \right) - A(\tau)$ . Hence, we can rewrite (77) as

$$\mathcal{I}(\tau) = \frac{1}{\tau^2} \text{Var}_{\mathbb{Q}^{(\tau)}} \left[ \log \left( \frac{d\mathbb{Q}^{(\tau)}}{d\mathbb{P}^{u_0}} \right) \right], \quad (84)$$

1286 which provides a way to estimate  $\mathcal{I}(\tau)$ , leveraging the Girsanov theorem to estimate  $\log \left( \frac{d\mathbb{Q}^{(\tau)}}{d\mathbb{P}^{u_0}} \right) =$   
 1287  $\log \left( \frac{d\mathbb{Q}^{(\tau)}}{d\mathbb{P}} \right) - \log \left( \frac{d\mathbb{P}^{u_0}}{d\mathbb{P}} \right)$ .

## 1288 J Details on trust region SOC algorithms

### 1289 J.1 Characterizing the solutions of the trust region optimization problem

1290 **Proposition J.1** (Characterizing the solutions of the trust region optimization problem). *The solution*  
 1291  *$\mathbb{P}^{u_{i+1}}$  of the problem (9) is unique and it satisfies*

- 1292 • *If  $D_{\text{KL}}(\mathbb{P}^{u_i}|\mathbb{Q}) \leq \varepsilon$ , then  $\mathbb{P}^{u_{i+1}} = \mathbb{Q}$ .*
- 1293 • *If  $D_{\text{KL}}(\mathbb{P}^{u_i}|\mathbb{Q}) \geq \varepsilon$ , then  $D_{\text{KL}}(\mathbb{P}^{u_{i+1}}|\mathbb{P}^{u_i}) = \varepsilon$ , i.e.  $\mathbb{P}^{u_{i+1}}$  is also the unique solution of the*  
 1294 *problem*

$$\arg \min_{u \in \mathcal{U}} D_{\text{KL}}(\mathbb{P}^u|\mathbb{Q}) \quad \text{s.t.} \quad D_{\text{KL}}(\mathbb{P}^u|\mathbb{P}^{u_i}) = \varepsilon. \quad (85)$$

1295 *Proof.* To prove the first case, observe that  $\mathbb{Q}$  is the only solution of the unconstrained problem  
 1296  $\arg \min_{\mathbb{P} \in \mathcal{P}} D_{\text{KL}}(\mathbb{P}|\mathbb{Q})$ , which means that it is also the unique solution of the problem (9) since it  
 1297 satisfies its constraint. To prove the second case, by the Karush-Kuhn-Tucker (KKT) conditions, we  
 1298 have that either  $\lambda = 0$ , or  $D_{\text{KL}}(\mathbb{P}^{u_{i+1}}|\mathbb{P}^{u_i}) = \varepsilon$ . Thus, if  $D_{\text{KL}}(\mathbb{P}^{u_{i+1}}|\mathbb{P}^{u_i}) < \varepsilon$ , then we must have  
 1299 that  $\lambda = 0$ . The first order optimality condition for the problem is as follows: for any perturbation  $v$   
 1300 of the control  $u_{i+1}$ , we have that

$$0 = \frac{d}{d\eta} (D_{\text{KL}}(\mathbb{P}^{u_{i+1}+\eta v}|\mathbb{Q}) + \lambda (D_{\text{KL}}(\mathbb{P}^{u_{i+1}+\eta v}|\mathbb{P}^{u_i}) - \varepsilon))|_{\eta=0} = \frac{d}{d\eta} D_{\text{KL}}(\mathbb{P}^{u_{i+1}+\eta v}|\mathbb{Q})|_{\eta=0}, \quad (86)$$

---

**Algorithm 2** Trust Region SOC with buffer

---

**Require:** Neural network  $u_\theta$  with parameters  $\theta$ , target path measure  $\mathbb{Q}$ , buffer size  $K$ , time discretization  $S = (s_j)_{j=0}^J \subset [0, T]$ , number of steps  $N$  per annealing, termination threshold  $\delta$   
Initialize  $i = 0$  and  $\lambda_0 = \infty$   
**for**  $i = 0, 1, \dots$  **do**  
  Define  $u_i = u_\theta$  (detached)  
  Simulate  $K$  trajectories  $(X_s^{(k)})_{s \in S}$  of the SDE in (1) with Brownian motion  $W_s^{(k)}$  and control  $u_i$   
  Compute importance weights  $w^{(k)} = \frac{d\mathbb{Q}}{d\mathbb{P}^{u_i}}(X^{(k)}) \propto \exp(-\mathcal{W}_i(X^{(k)}, 0))$  as in (12)  
  Initialize buffer  $\mathcal{B} = \{(W^{(k)}, X^{(k)}, w^{(k)})\}_{k=1}^K$   
  Compute multiplier  $\lambda_i = \arg \max_{\lambda \in \mathbb{R}^+} \mathcal{L}_{\text{Dual}}^{(i)}(\lambda)$  as in (14) using  $\mathcal{B}$  and a 1-dim. non-linear solver  
  **if**  $\lambda_i \leq \delta$  **then**  
    **return** control  $u_i$  with  $\mathbb{P}^{u_i} \approx \mathbb{Q}$   
  **if** adjoint matching loss **then**  
    Compute annealing  $\beta_{i+1} = 1 - \prod_{j=0}^i \frac{\lambda_j}{1+\lambda_j}$  as in Prop. 2.2  
    Compute lean adjoint states  $a_s^{(k)} = a_{i+1}(X_s^{(k)}, s)$ ,  $s \in S$ , as in (18) and store in  $\mathcal{B}$   
  **for**  $n = 1, \dots, N$  **do**  
    **if** adjoint matching loss **then**  
      Estimate  $\mathcal{L}(\theta) = \mathbb{E}_{(X, w, a) \sim \mathcal{B}, s \sim \text{Unif}(S)} [\|\sigma^\top a_s - u_\theta(X_s, s)\| w^{\frac{1}{1+\lambda_i}}]$  as in (19)  
    **if** log-variance loss **then**  
      Estimate  $\mathcal{L}(\theta) = \text{Var}_{(W, X, w) \sim \mathcal{B}} [\sum_{j=1}^J \frac{\|\Delta_j\|^2 (s_j - s_{j-1})}{2} + \Delta_j \cdot (W_{s_j} - W_{s_{j-1}}) + \frac{1}{1+\lambda_i} \log w]$   
      with  $\Delta_j = u_i(X_{s_j}, s_j) - u_\theta(X_{s_j}, s_j)$  as in (16)  
    Perform a gradient-descent step on  $\mathcal{L}(\theta)$

---

1301 which means that  $u_{i+1}$  satisfies the first-order optimality condition for the relative entropy loss  
1302  $u \mapsto D_{\text{KL}}(\mathbb{P}^u | \mathbb{Q})$ . By [83, Prop. 2], the only control that satisfies the first-order optimality condition  
1303 for the relative entropy loss is the optimal control  $u^*$ , which implies that  $\mathbb{P}^{u_{i+1}} = \mathbb{Q}$ , which is  
1304 a contradiction because  $\varepsilon > D_{\text{KL}}(\mathbb{P}^{u_{i+1}} | \mathbb{P}^{u_i}) = D_{\text{KL}}(\mathbb{P} | \mathbb{Q}) \geq \varepsilon$ . Hence, we conclude that  
1305  $D_{\text{KL}}(\mathbb{P}^{u_{i+1}} | \mathbb{P}^{u_i}) = \varepsilon$ . To show that the solution  $\mathbb{P}^{u_{i+1}}$  is unique, we use that  $\mathbb{P} \mapsto D_{\text{KL}}(\mathbb{P} | \mathbb{P}^{u_i})$   
1306 is strictly convex, and that  $\{\mathbb{P} | D_{\text{KL}}(\mathbb{P} | \mathbb{P}^{u_i}) \leq \varepsilon\}$  is a convex set because it is the sublevel set of a  
1307 convex functional.  $\square$

## 1308 J.2 Implementation

1309 We provide a detailed version of Algorithm 1 in Algorithm 2. The hyperparameters and repositories  
1310 for the experiments on unnormalized densities, transition path sampling, and fine-tuning can be found  
1311 in the respective sections in Apps. E, F and H.

## 1312 J.3 Variance of the importance weights and trust region bounds

1313 As mentioned in Remark 2.1, one motivation of the trust region constrain  $D_{\text{KL}}(\mathbb{P}^u | \mathbb{P}^{u_i}) \leq \varepsilon$  defined  
1314 in (4) is to keep the variance of the importance weights between two consecutive measures  $\mathbb{P}^{u_i}$  and  
1315  $\mathbb{P}^{u_{i+1}}$  small. This can be motivated by the inequality

$$\text{Var}_{\mathbb{P}^{u_i}} \left( \frac{d\mathbb{P}^{u_{i+1}}}{d\mathbb{P}^{u_i}} \right) = \mathbb{E}_{\mathbb{P}^{u_i}} \left[ \left( \frac{d\mathbb{P}^{u_{i+1}}}{d\mathbb{P}^{u_i}} \right)^2 - 1 \right] = \mathbb{E}_{\mathbb{P}^{u_{i+1}}} \left[ \frac{d\mathbb{P}^{u_{i+1}}}{d\mathbb{P}^{u_i}} - 1 \right] \quad (87a)$$

$$\geq \exp \left( \mathbb{E}_{\mathbb{P}^{u_{i+1}}} \left[ \log \frac{d\mathbb{P}^{u_{i+1}}}{d\mathbb{P}^{u_i}} \right] \right) - 1 = \exp(D_{\text{KL}}(\mathbb{P}^{u_{i+1}} | \mathbb{P}^{u_i})) - 1, \quad (87b)$$

1316 which follows by Jensen's inequality. While a lower bound on the variance is not straight forward for  
1317 path space measures (cf. [91]), we can consider the following heuristics. Let us assume that

$$\frac{d\mathbb{P}^{u_{i+1}}}{d\mathbb{P}^{u_i}} \approx 1 \quad (88)$$

1318  $\mathbb{P}^{u_i}$ - and  $\mathbb{P}^{u_{i+1}}$ -almost surely, which is reasonable if  $D_{\text{KL}}(\mathbb{P}^{u_{i+1}} | \mathbb{P}^{u_i}) \leq \varepsilon$  with  $\varepsilon \ll 1$ . By a Taylor  
1319 approximation it then holds

$$\left( \frac{d\mathbb{P}^{u_{i+1}}}{d\mathbb{P}^{u_i}} \right)^2 = \exp \left( 2 \log \frac{d\mathbb{P}^{u_{i+1}}}{d\mathbb{P}^{u_i}} \right) \approx 1 + 2 \log \frac{d\mathbb{P}^{u_{i+1}}}{d\mathbb{P}^{u_i}}. \quad (89)$$

Now, taking expectations w.r.t.  $\mathbb{P}^{u_i} \approx \mathbb{P}^{u_{i+1}}$ , respectively, using computations similar to (87), and assuming  $\bar{D}_{\text{KL}}(\mathbb{P}^{u_{i+1}}|\mathbb{P}^{u_i}) = \varepsilon$ , as argued in App. J.1, yields

$$\text{Var}_{\mathbb{P}^{u_i}} \left( \frac{d\mathbb{P}^{u_{i+1}}}{d\mathbb{P}^{u_i}} \right) \approx 2\varepsilon. \quad (90)$$

#### 1322 J.4 Lagrangian formulation

Using the Girsanov theorem (see App. A.3), we first note that we can write the Lagrangian as

$$\mathcal{L}_{\text{TR}}^{(i)}(u, \lambda) = \mathbb{E} \left[ \int_0^T \left( \frac{1}{2} \|u(X_s^u, s)\|^2 + f(X_s^u, s) \right) ds + g(X_T^u) \right] + \lambda (D_{\text{KL}}(\mathbb{P}^u|\mathbb{P}^{u_i}) - \varepsilon) \quad (91)$$

$$= \mathbb{E} \left[ \int_0^T \left( \frac{1}{2} \|u(X_s^u, s)\|^2 + \frac{\lambda}{2} \|u(X_s^u, s) - u_i(X_s^u, s)\|^2 + f(X_s^u, s) \right) ds + g(X_T^u) \right] - \lambda \varepsilon \quad (92)$$

$$= \mathbb{E} \left[ \int_0^T \left( \frac{1+\lambda}{2} \|u(X_s^u, s) - \frac{\lambda}{1+\lambda} u_i(X_s^u, s)\|^2 + f_i(X_s^u, s) \right) ds + g(X_T^u) \right] - \lambda \varepsilon \quad (93)$$

$$= \mathcal{L}_{\text{TRC}}^{(i)}(u, \lambda) - \lambda \varepsilon, \quad (94)$$

where  $\mathcal{L}_{\text{TRC}}^{(i)}(u, \lambda)$  is defined as in (11),  $\lambda \in \mathbb{R}^+$  is the Lagrangian multiplier for the trust region constraint, and we abbreviate  $f_i := \frac{\lambda}{2(1+\lambda)} \|u_i\|^2 + f$ . For fixed  $\lambda$ , optimizing the Lagrangian  $\mathcal{L}_{\text{TR}}^{(i)}(u, \lambda)$  with respect to  $u$  is again a SOC. As such, for a given  $u_i$ ,  $\lambda$ , we can define the value function as

$$V_{i+1}^\lambda(x, t) := \inf_{u \in \mathcal{U}} \mathbb{E} \left[ \int_t^T \left( \frac{1+\lambda}{2} \|u(X_s^u, s) - \frac{\lambda}{1+\lambda} u_i(X_s^u, s)\|^2 + f_i(X_s^u, s) \right) ds + g(X_T^u) \middle| X_t = x \right]. \quad (95)$$

The next proposition provides representations for the value function and the solution to the SOC problem.

**Proposition J.2** (Optimality for trust region SOC problems). *For fixed  $\lambda$ , let us define by*

$$V_{i+1}^\lambda(x, t) := \inf_{u \in \mathcal{U}} \mathbb{E} \left[ \int_0^T \left( \frac{1+\lambda}{2} \|u - \frac{\lambda}{1+\lambda} u_i\|^2 + \frac{\lambda}{2(1+\lambda)} \|u_i\|^2 + f \right) (X_s^u, s) ds + g(X_T^u) \middle| X_t = x \right]$$

*the value function of the SOC problem  $\inf_{u \in \mathcal{U}} \mathcal{L}_{\text{TRC}}^{(i)}(u, \lambda)$  corresponding to (11) and by  $u_{i+1}^\lambda$  its solution. Then it holds that*

$$(i) \text{ (Estimator for value function) } V_{i+1}^\lambda(x, t) = -(1 + \lambda) \log \mathbb{E} \left[ e^{-\frac{1}{1+\lambda} \mathcal{W}_i(X^{u_i}, t)} \middle| X_t^{u_i} = x \right],$$

$$\text{where } \mathcal{W}_i(X^{u_i}, t) = \int_t^T \frac{1}{2} \|u_i(X_s^{u_i}, s)\|^2 ds + \int_t^T u_i(X_s^{u_i}, s) \cdot dW_s + \mathcal{W}(X^{u_i}, t).$$

$$(ii) \text{ (Connection between solution and value function) It holds } u_{i+1}^\lambda = \frac{\lambda}{1+\lambda} u_i - \frac{1}{1+\lambda} \sigma^\top \nabla V_{i+1}^\lambda.$$

Moreover, for  $u_0 = \mathbf{0}$  and the optimal Lagrange multiplier  $\lambda_i$ , let us define the value function

$$\tilde{V}_{i+1}(x, t) := \inf_{u \in \mathcal{U}} \mathbb{E} \left[ \int_0^T \left( \frac{1}{2} \|u\|^2 + \beta_{i+1} f \right) (X_s^u, s) ds + \beta_{i+1} g(X_T^u) \middle| X_t = x \right]$$

of the SOC problem given by the optimal change of measure

$$\frac{d\mathbb{P}^{u_{i+1}}}{d\mathbb{P}}(X) \propto \left( \frac{d\mathbb{Q}}{d\mathbb{P}}(X) \right)^{\beta_{i+1}} \propto e^{-\beta_{i+1} \mathcal{W}(X, 0)} \quad (96)$$

as in Prop. 2.2 and (3). Then it holds that

$$(iii) \text{ (Estimator for value function) } \tilde{V}_{i+1}(x, t) = -\log \mathbb{E} \left[ e^{-\beta_{i+1} \mathcal{W}(X_t, t)} \middle| X_t = x \right],$$

$$(iv) \text{ (Connection between solution and value function) } u_{i+1} = u_{i+1}^{\lambda_i} = -\sigma^\top \nabla \tilde{V}_{i+1}.$$

*Proof.* For notational convenience, we abbreviate  $V = V_{i+1}^\lambda$  in this proof. From the verification theorem (see, e.g., [103, Theorem 3.5.2]), we obtain that the value function is the solution to the HJB

1342 equation

$$(\partial_t + L)V = - \inf_{\alpha \in \mathbb{R}^d} \left\{ f_i + \frac{1+\lambda}{2} \|\alpha - \frac{\lambda}{1+\lambda} u_i\|^2 + \sigma \alpha \cdot \nabla V \right\} \quad (97)$$

$$= -f_i - \inf_{\alpha \in \mathbb{R}^d} \left\{ \frac{1+\lambda}{2} \|\alpha - \frac{\lambda}{1+\lambda} u_i\|^2 + \sigma \alpha \cdot \nabla V \right\}, \quad V(\cdot, T) = g, \quad (98)$$

1343 where the infimum is pointwise for every  $(x, t) \in \mathbb{R}^d \times [0, T]$  and the optimal  $\alpha^*$  defines the solution  
1344  $u^*$ . Solving for  $\alpha$  yields  $\alpha^* = \frac{\lambda}{1+\lambda} u_i - \frac{1}{1+\lambda} \sigma^\top \nabla V$ , which proves Item (ii).

1345 Plugging this result back into the HJB equation, we obtain

$$(\partial_t + L)V = -f - \frac{\lambda}{2(1+\lambda)} \|u_i\|^2 - \frac{1}{2(1+\lambda)} \|\sigma^\top \nabla V\|^2 - \sigma \left( \frac{\lambda}{1+\lambda} u_i - \frac{1}{1+\lambda} \sigma \nabla V \right) \cdot \nabla V \quad (99)$$

$$= -f - \frac{\lambda}{2(1+\lambda)} \|u_i\|^2 + \frac{1}{2(1+\lambda)} \|\sigma^\top \nabla V\|^2 - \sigma \frac{\lambda}{1+\lambda} u_i \cdot \nabla V \quad (100)$$

$$= -f - \frac{\lambda}{2(1+\lambda)} \|u_i\|^2 + \frac{1}{2(1+\lambda)} \|\sigma^\top \nabla V\|^2 - \sigma u_i \cdot \nabla V + \sigma \frac{1}{1+\lambda} u_i \cdot \nabla V \quad (101)$$

1346 Now, we define the infinitesimal generator of the SDE

$$dX_s^{u_i} = (b(X_s^{u_i}, s) + \sigma u_i(X_s^{u_i}, s)) ds + \sigma dW_s \quad (102)$$

1347 as

$$\bar{L} := \frac{1}{2} \sum_{i,j} (\sigma \sigma^\top)_{ij} \partial_{x_i} \partial_{x_j} + \sum_i (b_i + \sigma(u_i)_i) \partial_{x_i} = L + \sum_i \sigma(u_i)_i \partial_{x_i}. \quad (103)$$

1348 Using (103), we can rewrite (101) as

$$(\partial_t + \bar{L})V = -f - \frac{\lambda}{2(1+\lambda)} \|u_i\|^2 + \frac{1}{2(1+\lambda)} \|\sigma^\top \nabla V\|^2 + \sigma \frac{1}{1+\lambda} u_i \cdot \nabla V \quad (104)$$

$$= -f - \frac{1}{2} \|u_i\|^2 + \frac{1}{2(1+\lambda)} \|u_i + \sigma^\top \nabla V\|^2 \quad (105)$$

1349 By Itô's formula (see App. A.3), we have

$$dV(X_s^{u_i}, s) = (\partial_s + \bar{L})V(X_s^{u_i}, s) ds + \sigma^\top \nabla V(X_s^{u_i}, s) \cdot dW_s. \quad (106)$$

1350 Plugging Eq. (105) in Eq. (106) and defining  $Y_s := V(X_s^{u_i}, s)$  and  $Z_s := (-u_i - \sigma \nabla V)(X_s^{u_i}, s)$ ,  
1351 we obtain the pair of forward-backward SDEs (FBSDEs)

$$dX_s^{u_i} = (b(X_s^{u_i}, s) + \sigma u_i(X_s^{u_i}, s)) ds + \sigma dW_s, \quad X_0^{u_i} \sim p_0, \quad (107)$$

$$dY_s = \left( -f(X_s^{u_i}, s) - \frac{1}{2} \|u_i(X_s^{u_i}, s)\|^2 + \frac{1}{2(1+\lambda)} \|Z_s\|^2 \right) ds - (u_i(X_s^{u_i}, s) + Z_s) \cdot dW_s, \quad (108)$$

1352 with  $Y_T = g(X_T^{u_i})$ . This shows that

$$g(X_T^{u_i}) = Y_t - \int_t^T \left( f_i(X_s^{u_i}, s) + \frac{1}{2} \|u_i(X_s^{u_i}, s)\|^2 - \frac{1}{2(1+\lambda)} \|Z_s\|^2 \right) ds - \int_t^T (u_i(X_s^{u_i}, s) + Z_s) \cdot dW_s,$$

1353 which can be rewritten as

$$\mathcal{W}_i(X^{u_i}, t) = Y_t + \int_t^T \frac{1}{2(1+\lambda)} \|Z_s\|^2 ds - \int_t^T Z_s \cdot dW_s. \quad (109)$$

1354 Using the definition of  $Y_t$ , we can now write

$$\begin{aligned} \mathbb{E} \left[ e^{-\frac{1}{1+\lambda} \mathcal{W}_i(X^{u_i}, t)} \middle| X_t^{u_i} = x \right] &= e^{-\frac{1}{1+\lambda} V(X_t^{u_i}, t)} \mathbb{E} \left[ e^{\frac{1}{1+\lambda} \int_t^T Z_s \cdot dW_s - \frac{1}{(1+\lambda)^2} \int_t^T \frac{1}{2} \|Z_s\|^2 ds} \middle| X_t^{u_i} = x \right] \\ &= e^{-\frac{1}{1+\lambda} V(X_t^{u_i}, t)}, \end{aligned}$$

1355 where leveraged Novikov's theorem to show that the Doléans-Dade exponential is a martingale with  
1356 vanishing expectation. This concludes the proof of Item (i). The proof of Items (iii) and (iv) follows  
1357 directly from Thm. D.1.  $\square$

## 1358 J.5 Log-variance with buffer and trust regions

1359 Here, we provide further details on the trust-region log-variance loss introduced in Sec. 2.2 and given  
1360 by

$$\mathcal{L}_{LV}(u) = \text{Var} \left[ \log \left( \frac{d\mathbb{P}^{u_{i+1}}}{d\mathbb{P}^u}(X^{u_i}) \right) \right] = \text{Var} \left[ \log \left( \frac{d\mathbb{P}^{u_{i+1}}}{d\mathbb{P}^{u_i}}(X^{u_i}) \frac{d\mathbb{P}^{u_i}}{d\mathbb{P}^u}(X^{u_i}) \right) \right]. \quad (110)$$

1361 The Girsanov's theorem (see App. A.3) shows that

$$\log \left( \frac{d\mathbb{P}^{u_i}}{d\mathbb{P}^u}(X^{u_i}) \right) = \int_0^T \frac{1}{2} \|u_i(X_s^{u_i}, s) - u(X_s^{u_i}, s)\|^2 ds + \int_0^T (u_i - u)(X_s^{u_i}, s) \cdot dW_s. \quad (111)$$

1362 Combining this result for  $u = 0$  with Prop. 2.2, we obtain

$$\frac{d\mathbb{P}^{u_{i+1}}}{d\mathbb{P}^{u_i}}(X^{u_i}) \propto \frac{1}{1+\lambda_i} \log \left( \frac{d\mathbb{Q}}{d\mathbb{P}} \frac{d\mathbb{P}}{d\mathbb{P}^{u_i}}(X^{u_i}) \right) \quad (112)$$

$$= e^{-\frac{1}{1+\lambda_i} \left( \int_0^T \frac{1}{2} \|u_i(X_s^{u_i}, s)\|^2 ds + \int_0^T u_i(X_s^{u_i}, s) \cdot dW_s + \mathcal{W}(X^{u_i}, 0) \right)}. \quad (113)$$

1363 Noting that the variance is shift-invariant, (111) and (112) imply that

$$\mathcal{L}_{LV}(u) = \text{Var} \left[ -\frac{1}{1+\lambda_i} \left( \int_0^T \frac{1}{2} \|u_i(X_s^{u_i}, s)\|^2 ds + \int_0^T u_i(X_s^{u_i}, s) \cdot dW_s + \mathcal{W}(X^{u_i}, 0) \right) \right] \quad (114)$$

$$+ \int_0^T \frac{1}{2} \|u_i(X_s^{u_i}, s) - u(X_s^{u_i}, s)\|^2 ds + \int_0^T (u_i - u)(X_s^{u_i}, s) \cdot dW_s \Big], \quad (115)$$

1364 which can be implemented by discretizing the integrals; see App. J.2.

1365 Please note that the loss reduces to

$$\mathcal{L}_{LV}(u) = \text{Var} \left[ \log \left( \frac{d\mathbb{Q}}{d\mathbb{P}^{u_i}}(X^{u_i}) \frac{d\mathbb{P}^{u_i}}{d\mathbb{P}^u}(X^{u_i}) \right) \right] = \text{Var} \left[ \log \left( \frac{d\mathbb{Q}}{d\mathbb{P}^u}(X^{u_i}) \right) \right] \quad (116)$$

1366 for  $\lambda_i = 0$ , which is how the loss is mostly used in the literature, where the variance is computed  
1367 using the most recent control, see e.g. [106].

## 1368 J.6 Trust-region stochastic optimal control matching via adjoint method

1369 Here, we provide further details on the trust-region version of the stochastic optimal control matching  
1370 (SOCM) loss introduced in [84]. We start from the cross-entropy loss, i.e., the forward KL divergence  
1371 between  $u_{i+1}$  and  $u$ , that is,

$$\mathcal{L}_{CE}(u) = D_{KL}(\mathbb{P}^{u_{i+1}} | \mathbb{P}^u) = \mathbb{E} \left[ \log \frac{d\mathbb{P}^{u_{i+1}}}{d\mathbb{P}^u}(X^{u_{i+1}}) \right]. \quad (117)$$

1372 Using Girsanov's theorem (see App. A.3), the cross-entropy loss can be written as

$$\mathcal{L}_{CE}(u) = \mathbb{E} \left[ \frac{1}{2} \int_0^T \|u_{i+1}(X_s^{u_{i+1}}, s) - u(X_s^{u_{i+1}}, s)\|^2 ds \right] \quad (118)$$

$$= \mathbb{E} \left[ \frac{1}{2} \int_0^T \|u_{i+1}(X_s^{u_i}, s) - u(X_s^{u_i}, s)\|^2 ds \frac{d\mathbb{P}^{u_{i+1}}}{d\mathbb{P}^{u_i}} \right]. \quad (119)$$

1373 Using the expression for the optimal control  $u_{i+1} = \frac{\lambda_i}{1+\lambda_i} u_i - \frac{1}{1+\lambda_i} \nabla V_{i+1}$ , see Prop. 2.5, yields

$$\mathcal{L}_{CE}(u) = \mathbb{E} \left[ \frac{1}{2} \int_0^T \left\| \frac{\lambda_i}{1+\lambda_i} u_i(X_s^{u_i}, s) - \frac{1}{1+\lambda_i} \sigma^\top \nabla V_{i+1}(X_s^{u_i}, s) - u(X_s^{u_i}, s) \right\|^2 ds \frac{d\mathbb{P}^{u_{i+1}}}{d\mathbb{P}^{u_i}} \right] \quad (120)$$

1374 with

$$\nabla_x V_{i+1}(x, t) = -(1+\lambda_i) \frac{\nabla_x \mathbb{E} \left[ e^{-\frac{1}{1+\lambda_i} \mathcal{W}_i(X^{u_i}, t)} \Big| X_t^{u_i} = x \right]}{\mathbb{E} \left[ e^{-\frac{1}{1+\lambda_i} \mathcal{W}_i(X^{u_i}, t)} \Big| X_t^{u_i} = x \right]}. \quad (121)$$

1375 We use the adjoint method [83, see Lemma 5] to evaluate the conditional expectation (121)<sup>8</sup>, giving

$$\nabla_x \mathbb{E} \left[ e^{-\frac{1}{1+\lambda_i} \mathcal{W}_i(X^{u_i}, t)} \Big| X_t^{u_i} = x \right] = \mathbb{E} \left[ \tilde{a}(t, u_i, X^{u_i}) e^{-\frac{1}{1+\lambda_i} \mathcal{W}_i(X^{u_i}, t)} \Big| X_t^{u_i} = x \right] \quad (122)$$

1376 where the adjoint state  $\tilde{a}(t, u_i, X^{u_i})$  satisfies the ordinary differential equation (ODE)

$$\frac{d}{ds} \tilde{a}(s, u_i, X_s^{u_i}) = - \left[ (\nabla(b(X_s^{u_i}, s) + \sigma u_i(X_s^{u_i}, s)))^\top \tilde{a}(u_i, X_s^{u_i}, s) \right. \quad (123)$$

$$\left. + \frac{1}{1+\lambda_i} \nabla(f(X_s^{u_i}, s) + \frac{1}{2} \|u_i(X_s^{u_i}, s)\|^2) \right] \quad (124)$$

1377 with  $\tilde{a}(T, u_i, X_T^{u_i}) = \frac{1}{1+\lambda_i} \nabla g(X_T)$ . Using the argument from [85, Theorem 1], replacing the  
1378 path-wise reparameterization trick with the adjoint method, we arrive at the trust-region version of  
1379 the stochastic optimal control loss given by

$$\mathcal{L}_{SOCM}(u) = \mathbb{E} \left[ \frac{1}{2} \int_0^T \left\| \frac{\lambda_i}{1+\lambda_i} u_i(X_s^{u_i}, s) - \sigma^\top \tilde{a}(u_i, X_s^{u_i}, s) - u(X_s^{u_i}, s) \right\|^2 ds \frac{d\mathbb{P}^{u_{i+1}}}{d\mathbb{P}^{u_i}} \right] + K \quad (125)$$

<sup>8</sup>Note that there exist other methods for computing derivatives of functionals of stochastic processes. We refer the interested reader to [85].

for some  $K$  independent of  $u$ . However, the adjoint state contains the Jacobian  $\nabla u_i$  and the derivative  $\nabla \|u_i\|$ , which can be expensive in practice. In what follows, we rewrite the objective such that we can get rid of these terms.

## 1383 J.7 Trust-region stochastic optimal control matching via lean adjoint method

1384 Starting again from the cross-entropy loss, we now employ the alternative expression for the optimal  
1385 control as stated in Item (ii). This yields the objective

$$\mathcal{L}_{\text{CE}}(u) = \mathbb{E} \left[ \frac{1}{2} \int_0^T \|\sigma^\top \nabla \tilde{V}_{i+1}(X_s, s) - u(X_s, s)\|^2 ds \frac{d\mathbb{P}^{u_{i+1}}}{d\mathbb{P}} \right]. \quad (126)$$

1386 where the gradient of the smoothed value function is given by

$$\nabla_x \tilde{V}_{i+1}(x, t) = - \frac{\nabla_x \mathbb{E} \left[ e^{-\beta_i \mathcal{W}(X_t, 0)} | X_t = x \right]}{\mathbb{E} \left[ e^{-\beta_i \mathcal{W}(X_t, 0)} | X_t = x \right]} \quad (127)$$

1387 We evaluate the conditional expectation using the adjoint method:

$$\nabla_x \mathbb{E} \left[ e^{-\beta_i \mathcal{W}(X_t, 0)} | X_t = x \right] = \mathbb{E} \left[ a_{i+1}(X_s, s) e^{-\beta_i \mathcal{W}(X_t, 0)} | X_t = x \right]. \quad (128)$$

1388 where  $a_{i+1}(X_s, s)$  denotes the lean adjoint state [83], which satisfies the backward differential  
1389 equation:

$$\frac{d}{ds} a_{i+1}(X_s, s) = - \left[ (\nabla b(X_s, s))^\top a_{i+1}(X_s, s) + \beta_i \nabla f(X_s, s) \right] \quad (129)$$

1390 with terminal condition  $a_{i+1}(X_T, T) = \beta_i \nabla g(X_T)$ . Following the derivations in [85], we arrive at  
1391 the objective:

$$\mathcal{L}_{\text{SOCM}}(u) = \mathbb{E} \left[ \frac{1}{2} \int_0^T \|\sigma^\top a_{i+1}(X_s, s) - u(X_s, s)\|^2 ds \frac{d\mathbb{P}^{u_{i+1}}}{d\mathbb{P}}(X) \right]. \quad (130)$$

1392 Finally, performing a change of measure to the previous control  $u_i$  gives the expression:

$$\mathcal{L}_{\text{SOCM}}(u) = \mathbb{E} \left[ \frac{1}{2} \int_0^T \|\sigma^\top a_{i+1}(X_s^{u_i}, s) - u(X_s^{u_i}, s)\|^2 ds \frac{d\mathbb{P}^{u_{i+1}}}{d\mathbb{P}^{u_i}} \right]. \quad (131)$$

1393 We remark that the adjoint ODE in (129) can be solved as

$$a_{i+1}(X_s, s) = \beta_i \exp \left( \int_s^T \nabla b(X_t, t)^\top dt \right) \nabla g(X_T) \quad (132)$$

1394 if  $f = 0$  and  $\nabla b(X_t, t) \nabla b(X_s, s) = \nabla b(X_s, s) \nabla b(X_t, t)$  for all  $s, t \in [0, T]$  (i.e., the matrices at  
1395 different times commute). This allows us to solve the adjoint ODE exactly for our applications to  
1396 sampling from unnormalized densities; see App. E.

## 1397 K Trust regions for probability measures

1398 Our goal is to sample from a probability density of the form

$$p_{\text{target}}(x) = \frac{\rho_{\text{target}}(x)}{\mathcal{Z}}, \quad \text{with } \mathcal{Z} = \int \rho_{\text{target}}(x) dx, \quad (133)$$

1399 where we can evaluate  $\rho_{\text{target}}$  but typically do not have access to samples from  $p_{\text{target}}$ . To tackle this  
1400 problem, one can again formulate this problem as a variational problem by minimizing a divergence  
1401 between some  $q$  and the target density  $p_{\text{target}}$ . However, one can again incorporate an additional trust  
1402 region constraint, that is, an upper bound on the change of the variational distribution  $q$  within a  
1403 single update step. Formally, we are trying to solve the following problem

$$q_{i+1} = \arg \min_q D_{\text{KL}}(q \| p_{\text{target}}) \quad \text{s.t.} \quad D_{\text{KL}}(q \| q_i) \leq \varepsilon, \quad \int dq = 1 \quad (134)$$

1404 where  $q_i$  is the variational distribution from the previous iteration. We again tackle the constrained  
1405 optimization problem in (134) using Lagrangian multipliers. The Lagrangian is given by

$$\mathcal{L}_{\text{TR}}^{(i)}(q, \lambda, \omega) = D_{\text{KL}}(q \| p_{\text{target}}) + \lambda (D_{\text{KL}}(q \| q_i) - \varepsilon) + \omega \left( \int dq - 1 \right) \quad (135)$$

1406 with Lagrangian multipliers  $\lambda, \omega$ . Taking the functional derivative  $\delta \mathcal{L}_{\text{TR}}^{(i)}(q, \lambda, \omega) / \delta q$  and setting it to  
1407 zero admits a closed-form solution for the optimal density  $q_{i+1}$  as the geometric average between the

old distribution and the (unnormalized) optimal distribution, that is,<sup>9</sup>

$$q_{i+1}(\lambda) = \arg \min_q \mathcal{L}_{\text{TR}}^{(i)}(q, \lambda) = \frac{q_i^{\frac{\lambda}{1+\lambda}} \rho_{\text{target}}^{\frac{1}{1+\lambda}}}{\mathcal{Z}_i(\lambda)}, \quad \text{with} \quad \mathcal{Z}_i(\lambda) = \int q_i^{\frac{\lambda}{1+\lambda}}(x) \rho_{\text{target}}^{\frac{1}{1+\lambda}}(x) dx. \quad (136)$$

Plugging the optimal distribution back into the Lagrangian yields the dual function

$$\mathcal{L}_{\text{Dual}}^{(i)}(\lambda) = \mathcal{L}_{\text{TR}}^{(i)}(q_{i+1}(\lambda), \lambda) = -(1 + \lambda) \log \mathcal{Z}_i(\lambda) - \lambda \varepsilon. \quad (137)$$

Note that we can use any non-linear optimizer for solving for the optimal Lagrangian multiplier by maximizing the dual function, i.e.,

$$\lambda_i = \arg \max_{\lambda \in \mathbb{R}^+} \mathcal{L}_{\text{Dual}}^{(i)}(\lambda). \quad (138)$$

---

<sup>9</sup>Note the dependence of  $\mathcal{L}_{\text{TR}}^{(i)}$  on  $\omega$  vanishes as  $q_{i+1}$  satisfies the normalization constraint.

## Appendix References

- [64] T. Akhound-Sadegh, J. Rector-Brooks, A. J. Bose, S. Mittal, P. Lemos, C.-H. Liu, M. Sendera, S. Ravanbakhsh, G. Gidel, Y. Bengio, et al. Iterated denoising energy matching for sampling from boltzmann densities. *arXiv preprint arXiv:2402.06121*, 2024.
- [65] M. S. Albergo and E. Vanden-Eijnden. Nets: A non-equilibrium transport sampler. *arXiv preprint arXiv:2410.02711*, 2024.
- [66] C. Beck, S. Becker, P. Grohs, N. Jaafari, and A. Jentzen. Solving the kolmogorov pde by means of deep learning. *Journal of Scientific Computing*, 88:1–28, 2021.
- [67] J. Berner, M. Dablander, and P. Grohs. Numerically solving parametric families of high-dimensional kolmogorov partial differential equations via deep learning. *Advances in Neural Information Processing Systems*, 33:16615–16627, 2020.
- [68] J. Berner, L. Richter, and K. Ullrich. An optimal control perspective on diffusion-based generative modeling. *arXiv preprint arXiv:2211.01364*, 2022.
- [69] K. Black, M. Janner, Y. Du, I. Kostrikov, and S. Levine. Training diffusion models with reinforcement learning. In *The Twelfth International Conference on Learning Representations*, 2024.
- [70] D. Blessing, X. Jia, J. Esslinger, F. Vargas, and G. Neumann. Beyond elbos: A large-scale evaluation of variational methods for sampling. *arXiv preprint arXiv:2406.07423*, 2024.
- [71] P. G. Bolhuis, D. Chandler, C. Dellago, and P. L. Geissler. Transition path sampling: Throwing ropes over rough mountain passes, in the dark. *Annual review of physical chemistry*, 53(1):291–318, 2002.
- [72] J. Bradbury, R. Frostig, P. Hawkins, M. J. Johnson, C. Leary, D. Maclaurin, G. Necula, A. Paszke, J. VanderPlas, S. Wanderman-Milne, et al. Jax: Autograd and xla. *Astrophysics Source Code Library*, pages ascl–2111, 2021.
- [73] R. Chetrite and H. Touchette. Variational and optimal control representations of conditioned and driven processes. *Journal of Statistical Mechanics: Theory and Experiment*, 2015(12):P12001, 2015.
- [74] K. Clark, P. Vicol, K. Swersky, and D. J. Fleet. Directly fine-tuning diffusion models on differentiable rewards. In *The Twelfth International Conference on Learning Representations*, 2024.
- [75] M. Cuturi. Sinkhorn distances: Lightspeed computation of optimal transport. *Advances in neural information processing systems*, 26, 2013.
- [76] M. Cuturi, L. Meng-Papaxanthos, Y. Tian, C. Bunne, G. Davis, and O. Teboul. Optimal transport tools (OTT): A jax toolbox for all things Wasserstein. *arXiv preprint arXiv:2201.12324*, 2022.
- [77] P. Dai Pra. A stochastic control approach to reciprocal diffusion processes. *Applied mathematics and Optimization*, 23(1):313–329, 1991.
- [78] A. Das, D. C. Rose, J. P. Garrahan, and D. T. Limmer. Reinforcement learning of rare diffusive dynamics. *The Journal of Chemical Physics*, 155(13), 2021.
- [79] C. Dellago, P. G. Bolhuis, and D. Chandler. Efficient transition path sampling: Application to lennard-jones cluster rearrangements. *The Journal of chemical physics*, 108(22):9236–9245, 1998.
- [80] Z. Ding, Y. Jiao, X. Lu, Z. Yang, and C. Yuan. Sampling via Föllmer flow. *arXiv preprint arXiv:2311.03660*, 2023.
- [81] C. Domingo-Enrich. A taxonomy of loss functions for stochastic optimal control. *arXiv preprint arXiv:2410.00345*, 2024.



- [82] C. Domingo-Enrich, M. Drozdal, B. Karrer, and R. T. Chen. Adjoint matching: Fine-tuning flow and diffusion generative models with memoryless stochastic optimal control. *arXiv preprint arXiv:2409.08861*, 2024.
- [83] C. Domingo-Enrich, M. Drozdal, B. Karrer, and R. T. Q. Chen. Adjoint matching: Fine-tuning flow and diffusion generative models with memoryless stochastic optimal control. In *The Thirteenth International Conference on Learning Representations*, 2025.
- [84] C. Domingo-Enrich, J. Han, B. Amos, J. Bruna, and R. T. Chen. Stochastic optimal control matching. *arXiv preprint arXiv:2312.02027*, 2023.
- [85] C. Domingo-Enrich, J. Han, B. Amos, J. Bruna, and R. T. Q. Chen. Stochastic optimal control matching. In *The Thirty-eighth Annual Conference on Neural Information Processing Systems*, 2024.
- [86] Y. Du, M. Plainier, R. Brekelmans, C. Duan, F. Noe, C. P. Gomes, A. Aspuru-Guzik, and K. Neklyudov. Doob’s lagrangian: A sample-efficient variational approach to transition path sampling. In *The Thirty-eighth Annual Conference on Neural Information Processing Systems*, 2024.
- [87] Y. Fan, O. Watkins, Y. Du, H. Liu, M. Ryu, C. Boutilier, P. Abbeel, M. Ghavamzadeh, K. Lee, and K. Lee. Dpok: Reinforcement learning for fine-tuning text-to-image diffusion models. *arXiv preprint arXiv:2305.16381*, 2023.
- [88] W. H. Fleming and H. M. Soner. *Controlled Markov processes and viscosity solutions*, volume 25. Springer Science & Business Media, 2006.
- [89] L. Grenioux, M. Noble, and M. Gabri  . Improving the evaluation of samplers on multi-modal targets. *arXiv preprint arXiv:2504.08916*, 2025.
- [90] J. Han, A. Jentzen, and W. E. Solving high-dimensional partial differential equations using deep learning. *Proceedings of the National Academy of Sciences*, 115(34):8505–8510, 2018.
- [91] C. Hartmann and L. Richter. Nonasymptotic bounds for suboptimal importance sampling. *SIAM/ASA Journal on Uncertainty Quantification*, 12(2):309–346, 2024.
- [92] D. Hendrycks and K. Gimpel. Gaussian error linear units (gelus). *arXiv preprint arXiv:1606.08415*, 2016.
- [93] L. Holdijk, Y. Du, F. Hooft, P. Jaini, B. Ensing, and M. Welling. Stochastic optimal control for collective variable free sampling of molecular transition paths. In *Thirty-seventh Conference on Neural Information Processing Systems*, 2023.
- [94] J. Huang, Y. Jiao, L. Kang, X. Liao, J. Liu, and Y. Liu. Schr  dinger-f  llmer sampler: sampling without ergodicity. *arXiv preprint arXiv:2106.10880*, 2021.
- [95] X. Huang, H. Dong, Y. Hao, Y. Ma, and T. Zhang. Monte carlo sampling without isoperimetry: A reverse diffusion approach. *arXiv preprint arXiv:2307.02037*, 2023.
- [96] D. P. Kingma. Adam: A method for stochastic optimization. *arXiv preprint arXiv:1412.6980*, 2014.
- [97] J. Liu, G. Liu, J. Liang, Y. Li, J. Liu, X. Wang, P. Wan, D. Zhang, and W. Ouyang. Flow-GRPO: Training flow matching models via online RL, 2025.
- [98] Z. Liu, T. Z. Xiao, W. Liu, Y. Bengio, and D. Zhang. Efficient diversity-preserving diffusion alignment via gradient-informed GFlowNets, 2024.
- [99] L. I. Midgley, V. Stimper, G. N. Simm, B. Sch  lkopf, and J. M. Hern  ndez-Lobato. Flow annealed importance sampling bootstrap. *arXiv preprint arXiv:2208.01893*, 2022.
- [100] M. Noble, L. Grenioux, M. Gabri  , and A. O. Durmus. Learned reference-based diffusion sampling for multi-modal distributions. *arXiv preprint arXiv:2410.19449*, 2024.

- [101] N. Nüsken and L. Richter. Solving high-dimensional Hamilton–Jacobi–Bellman pdes using neural networks: perspectives from the theory of controlled diffusions and measures on path space. *Partial differential equations and applications*, 2:1–48, 2021.
- [102] M. Pavon. Stochastic control and nonequilibrium thermodynamical systems. *Applied Mathematics and Optimization*, 19(1):187–202, 1989.
- [103] H. Pham. *Continuous-time Stochastic Control and Optimization with Financial Applications*. Stochastic Modelling and Applied Probability. Springer Berlin Heidelberg, 2009.
- [104] L. Richter. *Solving high-dimensional PDEs, approximation of path space measures and importance sampling of diffusions*. PhD thesis, BTU Cottbus-Senftenberg, 2021.
- [105] L. Richter and J. Berner. Robust SDE-based variational formulations for solving linear PDEs via deep learning. In *International Conference on Machine Learning*, pages 18649–18666. PMLR, 2022.
- [106] L. Richter, J. Berner, and G.-H. Liu. Improved sampling via learned diffusions. *arXiv preprint arXiv:2307.01198*, 2023.
- [107] L. Richter, L. Sallandt, and N. Nüsken. Solving high-dimensional parabolic pdes using the tensor train format. In *International Conference on Machine Learning*, pages 8998–9009. PMLR, 2021.
- [108] L. Richter, L. Sallandt, and N. Nüsken. From continuous-time formulations to discretization schemes: tensor trains and robust regression for bsdes and parabolic pdes. *arXiv preprint arXiv:2307.15496*, 2023.
- [109] D. C. Rose, J. F. Mair, and J. P. Garrahan. A reinforcement learning approach to rare trajectory sampling. *New Journal of Physics*, 23(1):013013, 2021.
- [110] M. Sabate Vidales, D. Šiška, and L. Szpruch. Unbiased deep solvers for linear parametric PDEs. *Applied Mathematical Finance*, 28(4):299–329, 2021.
- [111] M. Sendera, M. Kim, S. Mittal, P. Lemos, L. Scimeca, J. Rector-Brooks, A. Adam, Y. Bengio, and N. Malkin. Improved off-policy training of diffusion samplers. *Advances in Neural Information Processing Systems*, 37:81016–81045, 2024.
- [112] K. Seong, S. Park, S. Kim, W. Y. Kim, and S. Ahn. Transition path sampling with improved off-policy training of diffusion path samplers. *arXiv preprint arXiv:2405.19961*, 2024.
- [113] A. N. Singh, A. Das, and D. T. Limmer. Variational path sampling of rare dynamical events. *Annual Review of Physical Chemistry*, 76, 2025.
- [114] A. N. Singh and D. T. Limmer. Variational deep learning of equilibrium transition path ensembles. *The Journal of Chemical Physics*, 159(2), 2023.
- [115] J. Sun, J. Berner, L. Richter, M. Zeinhofer, J. Müller, K. Azizzadenesheli, and A. Anandkumar. Dynamical measure transport and neural PDE solvers for sampling. *arXiv preprint arXiv:2407.07873*, 2024.
- [116] H. Y. Tan, S. Osher, and W. Li. Noise-free sampling algorithms via regularized wasserstein proximals. *arXiv preprint arXiv:2308.14945*, 2023.
- [117] M. Tancik, P. Srinivasan, B. Mildenhall, S. Fridovich-Keil, N. Raghavan, U. Singhal, R. Ramamoorthi, J. Barron, and R. Ng. Fourier features let networks learn high frequency functions in low dimensional domains. *Advances in neural information processing systems*, 33:7537–7547, 2020.
- [118] M. Uehara, Y. Zhao, K. Black, E. Hajiramezanali, G. Scalia, N. L. Diamant, A. M. Tseng, T. Biancalani, and S. Levine. Fine-tuning of continuous-time diffusion models as entropy-regularized control. *arXiv preprint arXiv:2402.15194*, 2024.
- [119] R. Van Handel. Stochastic calculus, filtering, and stochastic control. *Course notes.*, URL <http://www.princeton.edu/rvan/acm217/ACM217.pdf>, 14, 2007.

- 1549 [120] E. Vanden-Eijnden et al. Transition-path theory and path-finding algorithms for the study of  
1550 rare events. *Annual review of physical chemistry*, 61:391–420, 2010.
- 1551 [121] F. Vargas, W. Grathwohl, and A. Doucet. Denoising diffusion samplers. *arXiv preprint*  
1552 *arXiv:2302.13834*, 2023.
- 1553 [122] F. Vargas, A. Ovsianas, D. Fernandes, M. Girolami, N. D. Lawrence, and N. Nüsken. Bayesian  
1554 learning via neural schrödinger–föllmer flows. *Statistics and Computing*, 33(1):3, 2023.
- 1555 [123] F. Vargas, S. Padhy, D. Blessing, and N. Nüsken. Transport meets variational inference:  
1556 Controlled Monte Carlo diffusions. In *The Twelfth International Conference on Learning*  
1557 *Representations*, 2024.
- 1558 [124] H. Wu, J. Köhler, and F. Noé. Stochastic normalizing flows. *Advances in neural information*  
1559 *processing systems*, 33:5933–5944, 2020.
- 1560 [125] J. Xu, X. Liu, Y. Wu, Y. Tong, Q. Li, M. Ding, J. Tang, and Y. Dong. Imagereward: Learning  
1561 and evaluating human preferences for text-to-image generation. In *Thirty-seventh Conference*  
1562 *on Neural Information Processing Systems*, 2023.
- 1563 [126] J. Yan, H. Touchette, and G. M. Rotskoff. Learning nonequilibrium control forces to character-  
1564 ize dynamical phase transitions. *Physical Review E*, 105(2):024115, 2022.
- 1565 [127] D. Zhang, R. T. Chen, C.-H. Liu, A. Courville, and Y. Bengio. Diffusion generative flow  
1566 samplers: Improving learning signals through partial trajectory optimization. In *The Twelfth*  
1567 *International Conference on Learning Representations*, 2024.
- 1568 [128] D. Zhang, Y. Zhang, J. Gu, R. Zhang, J. Susskind, N. Jaitly, and S. Zhai. Improving GFlowNets  
1569 for text-to-image diffusion alignment. *arXiv preprint arXiv:2406.00633*, 2024.
- 1570 [129] Q. Zhang and Y. Chen. Path Integral Sampler: a stochastic control approach for sampling. In  
1571 *International Conference on Learning Representations*, 2022.
